# Supplementary material for: Heat Capacities of L-Cysteine, L-Serine, L-Threonine, L-Lysine, and L-Methionine
Source: MDPI journal article supplement (doi:10.3390/molecules28010451), 2023-01-03
Supplement: s1 [file s1]

# Supplementary Materials

## Heat capacities of L-cysteine, L-serine, L-threonine, L-lysine, and L-methionine

*Václav Pokorný<sup>1,2</sup>, Vojtěch Štejfá<sup>1</sup>, Jakub Havlín<sup>3</sup>, Michal Fulem<sup>1</sup>, Květoslav Růžička<sup>1,\*</sup>*

<sup>1</sup> Department of Physical Chemistry, University of Chemistry and Technology,  
Prague, Technická 5, CZ-166 28 Prague 6, Czech Republic

<sup>2</sup> Institute of Macromolecular Chemistry, Czech Academy of Sciences,  
Heyrovského nám. 2, CZ-162 06 Prague 6, Czech Republic

<sup>3</sup> Central Laboratories, University of Chemistry and Technology, Prague, Technická  
5, CZ-166 28 Prague 6, Czech Republic

\* Correspondence: ruzickak@vscht.cz

Supplementary materials contain:

- 1) Analysis of adiabatic data for amino acids reported by the Lomonosov Moscow State University.
- 2) Experimental heat capacity data of L-cysteine, L-serine, L-threonine, L-lysine, and L-methionine measured using SETARAM  $\mu$ DSC IIIa, SETARAM MicroCalvet, PerkinElmer DSC 8500, and Quantum Design PPMS.
- 3) Tabulated thermodynamic functions (heat capacity, entropy, enthalpy, Gibbs energy) of L-cysteine, L-serine, L-threonine, L-lysine, and L-methionine.

# 1) Analysis of adiabatic data for amino acids reported by the Lomonosov Moscow State University

Adiabatic small-volume calorimeter at the Lomonosov Moscow State University was commissioned in 1997 [1] and its function was checked using copper with deviations less than 0.6 percent and 0.2 percent below and above 70 K, respectively. For *n*-heptane, deviations were below 1.4 percent and 0.3 percent [1]. In the case of recent work reporting the heat capacities of amino acids, it appears that this apparatus had a problem when switching from helium to nitrogen cooling. For L-tryptophan [2] and L-threonine [3], there is an apparent discontinuity in heat capacity near 80 K where the transition from helium cooling to nitrogen cooling occurs (see Figure S1a and S1b). In the case of L-tryptophan [2], the authors suggested that this mismatch is a phase transition. Cole et al. [4] published heat capacity of L-tryptophan previously and did not observe any such phase transition (note that agreement between Cole et al. [4] and our data [5] is excellent, as seen in Figure S1a). The same discontinuity appears for L-threonine at the same temperature as well (Figure S1b). Additional breaks on the heat capacity curve are observed around 300 as well as around 350 K for these two compounds. This problem seems to appear only in publications [2,3] and is not present in the most recent publication reporting data for L-asparagine monohydrate [6]; however, when we compare data this data with the work of Hutchens et al. [7], mutual agreement is worse than expected for adiabatic calorimeters, especially below 80 K (see Figure S1c and S1d). Based on these findings, the data published by Lukyanova et al. [3] were excluded from the heat capacity fitting for L-threonine, despite the moderate agreement with the data of this work.

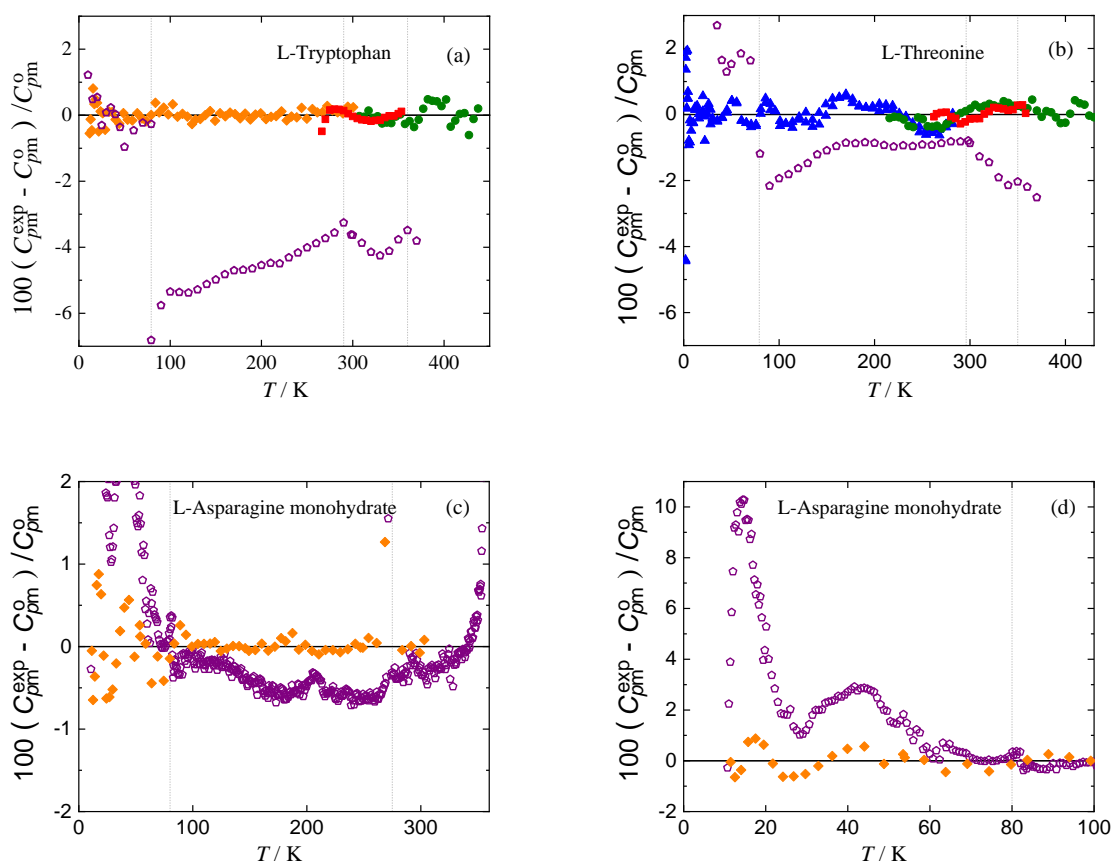

**Figure S1.** Relative deviations of individual experimental heat capacities from values calculated by means of Eqs. 1 and 2 based on data represented by filled symbols. (a) L-tryptophan, (b) L-threonine, (c,d) L-asparagine monohydrate. Blue  $\blacktriangle$ , this work (relaxation calorimetry); red  $\blacksquare$ , this work (Tian-Calvet calorimetry); green  $\bullet$ , this work (power compensation DSC); orange  $\blacklozenge$ , Hutchens and coworkers [4,7]; purple  $\diamond$ , Lukyanova and coworkers [2,3,6]. Vertical lines highlight anomalies on heat capacity data.

## 2) Experimental heat capacities

This section contains experimental heat capacity data obtained in this work by the means of Tian-Calvet calorimetry (2 apparatuses – SETARAM  $\mu$ DSC IIIa and SETARAM MicroCalvet), power-compensation differential scanning calorimetry (apparatus PerkinElmer DSC 8500), and relaxation calorimetry (apparatus Quantum Design PPMS). Due to their lower accuracy, data obtained using the PerkinElmer DSC 8500 and Quantum Design PPMS were slightly adjusted to agree with results from the more accurate SETARAM  $\mu$ DSC IIIa, as described in section 3.4 of the main manuscript. These correction factors are shown in the footnote of each table.

**Table S1:** Experimental Heat Capacity  $C_{pm}^o$  of L-Cysteine<sup>a</sup> ( $\text{J K}^{-1} \text{mol}^{-1}$ ) at  $p = (100 \pm 5) \text{ kPa}$ .

| SETARAM $\mu$ DSC IIIa <sup>b</sup><br>( $m = 421.93 \text{ mg}$ ) |                                                                            |                                  | PerkinElmer DSC 8500 <sup>c</sup><br>( $m = 21.23 \text{ mg}$ ) |                                                                            |                                  |                                  |
|--------------------------------------------------------------------|----------------------------------------------------------------------------|----------------------------------|-----------------------------------------------------------------|----------------------------------------------------------------------------|----------------------------------|----------------------------------|
| $T / \text{K}$                                                     | $C_{pm}^o / \text{J} \cdot \text{K}^{-1} \cdot \text{mol}^{-1} \text{ }^d$ | $\delta_{\text{rel}} \text{ }^e$ | $T / \text{K}$                                                  | $C_{pm}^o / \text{J} \cdot \text{K}^{-1} \cdot \text{mol}^{-1} \text{ }^d$ | $C_{pm}^o \text{ corrected } ^f$ | $\delta_{\text{rel}} \text{ }^e$ |
| 267.26                                                             | 132.44                                                                     | -0.72                            | 215.78                                                          | 115.31                                                                     | 115.36                           | 0.51                             |
| 270.00                                                             | 133.75                                                                     | -0.48                            | 220.72                                                          | 117.06                                                                     | 117.11                           | 0.47                             |
| 275.00                                                             | 135.88                                                                     | -0.24                            | 225.67                                                          | 118.70                                                                     | 118.75                           | 0.33                             |
| 280.00                                                             | 137.79                                                                     | -0.17                            | 230.64                                                          | 120.23                                                                     | 120.28                           | 0.10                             |
| 285.00                                                             | 139.68                                                                     | -0.12                            | 235.61                                                          | 122.05                                                                     | 122.11                           | 0.13                             |
| 290.00                                                             | 141.57                                                                     | -0.05                            | 240.59                                                          | 123.58                                                                     | 123.63                           | -0.10                            |
| 295.00                                                             | 143.38                                                                     | -0.06                            | 245.56                                                          | 125.60                                                                     | 125.65                           | 0.08                             |
| 300.00                                                             | 145.11                                                                     | -0.11                            | 250.55                                                          | 127.44                                                                     | 127.50                           | 0.11                             |
| 305.00                                                             | 146.89                                                                     | -0.13                            | 255.54                                                          | 128.98                                                                     | 129.03                           | -0.10                            |
| 310.00                                                             | 148.72                                                                     | -0.12                            | 260.54                                                          | 130.81                                                                     | 130.87                           | -0.08                            |
| 315.00                                                             | 150.58                                                                     | -0.08                            | 265.53                                                          | 132.46                                                                     | 132.51                           | -0.20                            |
| 320.00                                                             | 152.38                                                                     | -0.08                            | 270.51                                                          | 134.96                                                                     | 135.02                           | 0.32                             |
| 325.00                                                             | 154.19                                                                     | -0.08                            | 275.49                                                          | 136.41                                                                     | 136.47                           | 0.06                             |
| 330.00                                                             | 156.03                                                                     | -0.05                            | 280.47                                                          | 137.90                                                                     | 137.96                           | -0.17                            |
| 335.00                                                             | 157.86                                                                     | -0.03                            | 285.45                                                          | 139.36                                                                     | 139.42                           | -0.41                            |
| 340.00                                                             | 159.68                                                                     | -0.02                            | 290.43                                                          | 141.32                                                                     | 141.38                           | -0.30                            |
| 345.00                                                             | 161.53                                                                     | 0.02                             | 295.41                                                          | 143.09                                                                     | 143.15                           | -0.32                            |
| 350.00                                                             | 163.34                                                                     | 0.04                             | 300.39                                                          | 145.27                                                                     | 145.33                           | -0.06                            |
| 353.15                                                             | 164.44                                                                     | 0.02                             | 305.37                                                          | 146.95                                                                     | 147.01                           | -0.14                            |
|                                                                    |                                                                            |                                  | 310.36                                                          | 148.72                                                                     | 148.78                           | -0.16                            |
|                                                                    |                                                                            |                                  | 315.35                                                          | 150.44                                                                     | 150.50                           | -0.21                            |
|                                                                    |                                                                            |                                  | 320.32                                                          | 152.52                                                                     | 152.59                           | -0.02                            |
|                                                                    |                                                                            |                                  | 325.30                                                          | 154.12                                                                     | 154.18                           | -0.15                            |
|                                                                    |                                                                            |                                  | 330.28                                                          | 155.79                                                                     | 155.86                           | -0.22                            |
|                                                                    |                                                                            |                                  | 335.26                                                          | 157.40                                                                     | 157.47                           | -0.34                            |
|                                                                    |                                                                            |                                  | 340.24                                                          | 158.56                                                                     | 158.63                           | -0.73                            |
|                                                                    |                                                                            |                                  | 345.22                                                          | 161.47                                                                     | 161.54                           | -0.02                            |
|                                                                    |                                                                            |                                  | 350.21                                                          | 163.00                                                                     | 163.07                           | -0.18                            |
|                                                                    |                                                                            |                                  | 355.19                                                          | 165.24                                                                     | 165.31                           | 0.11                             |
|                                                                    |                                                                            |                                  | 360.18                                                          | 166.79                                                                     | 166.86                           | -0.02                            |
|                                                                    |                                                                            |                                  | 365.16                                                          | 168.59                                                                     | 168.66                           | 0.00                             |
|                                                                    |                                                                            |                                  | 370.15                                                          | 170.15                                                                     | 170.23                           | -0.12                            |
|                                                                    |                                                                            |                                  | 375.12                                                          | 171.76                                                                     | 171.83                           | -0.20                            |
|                                                                    |                                                                            |                                  | 380.10                                                          | 173.52                                                                     | 173.59                           | -0.18                            |
|                                                                    |                                                                            |                                  | 385.07                                                          | 175.19                                                                     | 175.27                           | -0.21                            |
|                                                                    |                                                                            |                                  | 390.05                                                          | 176.62                                                                     | 176.69                           | -0.38                            |
|                                                                    |                                                                            |                                  | 395.04                                                          | 178.43                                                                     | 178.51                           | -0.33                            |
|                                                                    |                                                                            |                                  | 400.02                                                          | 180.40                                                                     | 180.48                           | -0.18                            |
|                                                                    |                                                                            |                                  | 405.01                                                          | 182.50                                                                     | 182.57                           | 0.04                             |
|                                                                    |                                                                            |                                  | 409.99                                                          | 185.23                                                                     | 185.31                           | 0.61                             |

| SETARAM $\mu$ DSC IIIa <sup>b</sup><br>( $m = 421.93$ mg) |                                                                              |                                    | PerkinElmer DSC 8500 <sup>c</sup><br>( $m = 21.23$ mg) |                                                                              |                                   |                                    |
|-----------------------------------------------------------|------------------------------------------------------------------------------|------------------------------------|--------------------------------------------------------|------------------------------------------------------------------------------|-----------------------------------|------------------------------------|
| $T / \text{K}$                                            | $C_{pm}^o / \text{J} \cdot \text{K}^{-1} \cdot \text{mol}^{-1}$ <sup>d</sup> | $\delta_{\text{rel}}$ <sup>e</sup> | $T / \text{K}$                                         | $C_{pm}^o / \text{J} \cdot \text{K}^{-1} \cdot \text{mol}^{-1}$ <sup>d</sup> | $C_{pm}^o$ corrected <sup>f</sup> | $\delta_{\text{rel}}$ <sup>e</sup> |
|                                                           |                                                                              |                                    | 414.98                                                 | 186.49                                                                       | 186.57                            | 0.38                               |
|                                                           |                                                                              |                                    | 419.97                                                 | 188.18                                                                       | 188.26                            | 0.39                               |
|                                                           |                                                                              |                                    | 424.95                                                 | 190.53                                                                       | 190.61                            | 0.76                               |
|                                                           |                                                                              |                                    | 429.93                                                 | 192.49                                                                       | 192.57                            | 0.92                               |
|                                                           |                                                                              |                                    | 434.91                                                 | 192.43                                                                       | 192.50                            | 0.04                               |

<sup>a</sup> Polymorph I<sub>b</sub> (refcode LCYSTN12 deposited in the Cambridge structural database).

<sup>b</sup> Standard uncertainty of temperature is  $u(T) = 0.05$  K, and the combined expanded uncertainty of the heat capacity is  $U_c(C_{pm}^o) = 0.01 C_{pm}^o$  (0.95 level of confidence).

<sup>c</sup> Standard uncertainty of temperature is  $u(T) = 0.05$  K, and the combined expanded uncertainty of the heat capacity is  $U_c(C_{pm}^o) = 0.03 C_{pm}^o$  (0.95 level of confidence).

<sup>d</sup> Values are reported with one digit more than is justified by the experimental uncertainty to avoid round-off errors in calculations based on these results.

<sup>e</sup>  $\delta_{\text{rel}} = 100(C_{pm}^{\text{o,exp}} - C_{pm}^{\text{o,calc}}) / C_{pm}^{\text{o,calc}}$ , where  $C_{pm}^{\text{o,calc}}$  is heat capacity calculated by means of Eqs. 1 and 2 with parameters from Table 5.

<sup>f</sup> Experimental heat capacity data from PerkinElmer DSC 8500 has been multiplied by the factor of 1.0004 to agree with the more accurate heat capacities obtained with SETARAM  $\mu$ DSC IIIa data.

**Table S2:** Experimental Heat Capacity  $C_{pm}^o$  of L-Serine<sup>a</sup> ( $\text{J K}^{-1} \text{mol}^{-1}$ ) at  $p = (100 \pm 5)$  kPa

| SETARAM $\mu$ DSC IIIa <sup>b</sup><br>( $m = 423.02$ mg) |                                                                              |                                    | PerkinElmer DSC 8500 <sup>c</sup><br>( $m = 22.65$ mg) |                                                                              |                                   |                                    |
|-----------------------------------------------------------|------------------------------------------------------------------------------|------------------------------------|--------------------------------------------------------|------------------------------------------------------------------------------|-----------------------------------|------------------------------------|
| $T / \text{K}$                                            | $C_{pm}^o / \text{J} \cdot \text{K}^{-1} \cdot \text{mol}^{-1}$ <sup>d</sup> | $\delta_{\text{rel}}$ <sup>e</sup> | $T / \text{K}$                                         | $C_{pm}^o / \text{J} \cdot \text{K}^{-1} \cdot \text{mol}^{-1}$ <sup>d</sup> | $C_{pm}^o$ corrected <sup>f</sup> | $\delta_{\text{rel}}$ <sup>e</sup> |
| 266.15                                                    | 122.67                                                                       | -0.92                              | 215.78                                                 | 105.10                                                                       | 105.32                            | -1.04                              |
| 270.00                                                    | 124.40                                                                       | -0.58                              | 220.72                                                 | 106.85                                                                       | 107.07                            | -1.00                              |
| 275.00                                                    | 126.38                                                                       | -0.36                              | 225.67                                                 | 108.64                                                                       | 108.87                            | -0.92                              |
| 280.00                                                    | 128.15                                                                       | -0.31                              | 230.64                                                 | 110.17                                                                       | 110.40                            | -1.08                              |
| 285.00                                                    | 129.83                                                                       | -0.32                              | 235.61                                                 | 111.94                                                                       | 112.17                            | -1.01                              |
| 290.00                                                    | 131.56                                                                       | -0.30                              | 240.59                                                 | 113.46                                                                       | 113.69                            | -1.17                              |
| 295.00                                                    | 133.27                                                                       | -0.29                              | 245.56                                                 | 115.67                                                                       | 115.91                            | -0.72                              |
| 300.00                                                    | 134.98                                                                       | -0.28                              | 250.55                                                 | 117.43                                                                       | 117.68                            | -0.67                              |
| 305.00                                                    | 136.70                                                                       | -0.27                              | 255.54                                                 | 118.93                                                                       | 119.17                            | -0.84                              |
| 310.00                                                    | 138.40                                                                       | -0.27                              | 260.54                                                 | 120.64                                                                       | 120.89                            | -0.82                              |
| 315.00                                                    | 140.13                                                                       | -0.25                              | 265.53                                                 | 122.34                                                                       | 122.59                            | -0.82                              |
| 320.00                                                    | 141.83                                                                       | -0.25                              | 270.51                                                 | 124.00                                                                       | 124.26                            | -0.83                              |
| 325.00                                                    | 143.58                                                                       | -0.22                              | 275.49                                                 | 125.83                                                                       | 126.09                            | -0.72                              |
| 330.00                                                    | 145.30                                                                       | -0.21                              | 280.47                                                 | 127.49                                                                       | 127.76                            | -0.73                              |
| 335.00                                                    | 147.14                                                                       | -0.12                              | 285.45                                                 | 129.21                                                                       | 129.48                            | -0.71                              |
| 340.00                                                    | 148.90                                                                       | -0.08                              | 290.43                                                 | 131.07                                                                       | 131.35                            | -0.57                              |
| 345.00                                                    | 150.67                                                                       | -0.04                              | 295.41                                                 | 132.91                                                                       | 133.18                            | -0.46                              |
| 350.00                                                    | 152.57                                                                       | 0.07                               | 300.39                                                 | 134.81                                                                       | 135.09                            | -0.30                              |
| 353.35                                                    | 153.83                                                                       | 0.14                               | 305.37                                                 | 136.62                                                                       | 136.90                            | -0.21                              |
|                                                           |                                                                              |                                    | 310.36                                                 | 138.35                                                                       | 138.64                            | -0.19                              |
|                                                           |                                                                              |                                    | 315.35                                                 | 140.13                                                                       | 140.42                            | -0.13                              |
|                                                           |                                                                              |                                    | 320.32                                                 | 142.11                                                                       | 142.40                            | 0.07                               |
|                                                           |                                                                              |                                    | 325.30                                                 | 143.96                                                                       | 144.26                            | 0.18                               |
|                                                           |                                                                              |                                    | 330.28                                                 | 145.53                                                                       | 145.83                            | 0.09                               |
|                                                           |                                                                              |                                    | 335.26                                                 | 147.31                                                                       | 147.62                            | 0.14                               |
|                                                           |                                                                              |                                    | 340.24                                                 | 149.05                                                                       | 149.35                            | 0.16                               |
|                                                           |                                                                              |                                    | 345.22                                                 | 150.65                                                                       | 150.96                            | 0.10                               |
|                                                           |                                                                              |                                    | 350.21                                                 | 152.17                                                                       | 152.49                            | -0.02                              |

| SETARAM $\mu$ DSC IIIa <sup>b</sup><br>( $m = 423.02$ mg) |                                                                              |                                    | PerkinElmer DSC 8500 <sup>c</sup><br>( $m = 22.65$ mg) |                                                                              |                                   |                                    |
|-----------------------------------------------------------|------------------------------------------------------------------------------|------------------------------------|--------------------------------------------------------|------------------------------------------------------------------------------|-----------------------------------|------------------------------------|
| $T / \text{K}$                                            | $C_{pm}^o / \text{J} \cdot \text{K}^{-1} \cdot \text{mol}^{-1}$ <sup>d</sup> | $\delta_{\text{rel}}$ <sup>e</sup> | $T / \text{K}$                                         | $C_{pm}^o / \text{J} \cdot \text{K}^{-1} \cdot \text{mol}^{-1}$ <sup>d</sup> | $C_{pm}^o$ corrected <sup>f</sup> | $\delta_{\text{rel}}$ <sup>e</sup> |
|                                                           |                                                                              |                                    | 355.19                                                 | 154.11                                                                       | 154.43                            | 0.13                               |
|                                                           |                                                                              |                                    | 360.18                                                 | 155.29                                                                       | 155.61                            | -0.22                              |
|                                                           |                                                                              |                                    | 365.16                                                 | 157.40                                                                       | 157.73                            | 0.04                               |
|                                                           |                                                                              |                                    | 370.15                                                 | 158.63                                                                       | 158.96                            | -0.26                              |
|                                                           |                                                                              |                                    | 375.12                                                 | 160.14                                                                       | 160.48                            | -0.38                              |
|                                                           |                                                                              |                                    | 380.10                                                 | 161.82                                                                       | 162.15                            | -0.40                              |
|                                                           |                                                                              |                                    | 385.07                                                 | 163.55                                                                       | 163.88                            | -0.38                              |
|                                                           |                                                                              |                                    | 390.05                                                 | 165.24                                                                       | 165.58                            | -0.39                              |
|                                                           |                                                                              |                                    | 395.04                                                 | 166.89                                                                       | 167.23                            | -0.43                              |
|                                                           |                                                                              |                                    | 400.02                                                 | 168.65                                                                       | 169.00                            | -0.39                              |
|                                                           |                                                                              |                                    | 405.01                                                 | 170.69                                                                       | 171.04                            | -0.20                              |
|                                                           |                                                                              |                                    | 409.99                                                 | 172.89                                                                       | 173.25                            | 0.08                               |
|                                                           |                                                                              |                                    | 414.98                                                 | 174.72                                                                       | 175.08                            | 0.14                               |
|                                                           |                                                                              |                                    | 419.97                                                 | 176.22                                                                       | 176.59                            | 0.01                               |
|                                                           |                                                                              |                                    | 424.95                                                 | 177.25                                                                       | 177.62                            | -0.38                              |
|                                                           |                                                                              |                                    | 429.93                                                 | 179.46                                                                       | 179.84                            | -0.10                              |
|                                                           |                                                                              |                                    | 434.91                                                 | 181.92                                                                       | 182.30                            | 0.31                               |
|                                                           |                                                                              |                                    | 439.88                                                 | 183.24                                                                       | 183.62                            | 0.09                               |
|                                                           |                                                                              |                                    | 444.86                                                 | 185.14                                                                       | 185.52                            | 0.18                               |
|                                                           |                                                                              |                                    | 449.84                                                 | 187.11                                                                       | 187.50                            | 0.32                               |

<sup>a</sup> Polymorph I (refcode LSERIN01 deposited in the Cambridge structural database).

<sup>b</sup> Standard uncertainty of temperature is  $u(T) = 0.05$  K, and the combined expanded uncertainty of the heat capacity is  $U_c(C_{pm}^o) = 0.01 C_{pm}^o$  (0.95 level of confidence).

<sup>c</sup> Standard uncertainty of temperature is  $u(T) = 0.05$  K, and the combined expanded uncertainty of the heat capacity is  $U_c(C_{pm}^o) = 0.03 C_{pm}^o$  (0.95 level of confidence).

<sup>d</sup> Values are reported with one digit more than is justified by the experimental uncertainty to avoid round-off errors in calculations based on these results.

<sup>e</sup>  $\delta_{\text{rel}} = 100(C_{pm}^{\text{o,exp}} - C_{pm}^{\text{o,calc}}) / C_{pm}^{\text{o,calc}}$ , where  $C_{pm}^{\text{o,calc}}$  is heat capacity calculated by means of Eqs. 1 and 2 with parameters from Table 5.

<sup>f</sup> Experimental heat capacity data from PerkinElmer DSC 8500 have been multiplied by the factor of 1.002 to agree with the more accurate heat capacities obtained with SETARAM  $\mu$ DSC IIIa.

**Table S3:** Experimental Heat Capacity  $C_{pm}^o$  of L-Threonine<sup>a</sup> ( $\text{J K}^{-1} \text{mol}^{-1}$ ) at  $p = (100 \pm 5)$  kPa

| SETARAM $\mu$ DSC IIIa <sup>b</sup><br>( $m = 426.66$ mg) |                                                                              |                                    | PerkinElmer DSC 8500 <sup>c</sup><br>( $m = 21.70$ mg) |                                                                              |                                   |                                    |
|-----------------------------------------------------------|------------------------------------------------------------------------------|------------------------------------|--------------------------------------------------------|------------------------------------------------------------------------------|-----------------------------------|------------------------------------|
| $T / \text{K}$                                            | $C_{pm}^o / \text{J} \cdot \text{K}^{-1} \cdot \text{mol}^{-1}$ <sup>d</sup> | $\delta_{\text{rel}}$ <sup>e</sup> | $T / \text{K}$                                         | $C_{pm}^o / \text{J} \cdot \text{K}^{-1} \cdot \text{mol}^{-1}$ <sup>d</sup> | $C_{pm}^o$ corrected <sup>f</sup> | $\delta_{\text{rel}}$ <sup>e</sup> |
| 262.26                                                    | 141.10                                                                       | -0.07                              | 215.78                                                 | 120.95                                                                       | 121.04                            | -0.11                              |
| 265.00                                                    | 142.40                                                                       | 0.02                               | 220.72                                                 | 123.13                                                                       | 123.23                            | -0.07                              |
| 270.00                                                    | 144.60                                                                       | 0.06                               | 225.67                                                 | 125.25                                                                       | 125.35                            | -0.08                              |
| 275.00                                                    | 146.76                                                                       | 0.07                               | 230.64                                                 | 127.30                                                                       | 127.40                            | -0.15                              |
| 280.00                                                    | 148.70                                                                       | -0.06                              | 235.61                                                 | 129.19                                                                       | 129.29                            | -0.35                              |
| 285.00                                                    | 150.75                                                                       | -0.12                              | 240.59                                                 | 131.28                                                                       | 131.38                            | -0.38                              |
| 290.00                                                    | 152.65                                                                       | -0.28                              | 245.56                                                 | 133.80                                                                       | 133.90                            | -0.09                              |
| 295.00                                                    | 154.86                                                                       | -0.22                              | 250.55                                                 | 135.87                                                                       | 135.98                            | -0.14                              |
| 300.00                                                    | 157.13                                                                       | -0.14                              | 255.54                                                 | 137.71                                                                       | 137.82                            | -0.36                              |
| 305.00                                                    | 159.28                                                                       | -0.12                              | 260.54                                                 | 139.83                                                                       | 139.94                            | -0.37                              |
| 310.00                                                    | 161.41                                                                       | -0.12                              | 265.53                                                 | 142.01                                                                       | 142.12                            | -0.34                              |
| 315.00                                                    | 163.76                                                                       | 0.01                               | 270.51                                                 | 144.01                                                                       | 144.12                            | -0.42                              |
| 320.00                                                    | 166.02                                                                       | 0.09                               | 275.49                                                 | 146.33                                                                       | 146.45                            | -0.28                              |

| SETARAM $\mu$ DSC IIIa <sup>b</sup><br>( $m = 426.66$ mg) |                                                                              |                                    | PerkinElmer DSC 8500 <sup>c</sup><br>( $m = 21.70$ mg) |                                                                              |                                   |                                    |
|-----------------------------------------------------------|------------------------------------------------------------------------------|------------------------------------|--------------------------------------------------------|------------------------------------------------------------------------------|-----------------------------------|------------------------------------|
| $T / \text{K}$                                            | $C_{pm}^o / \text{J} \cdot \text{K}^{-1} \cdot \text{mol}^{-1}$ <sup>d</sup> | $\delta_{\text{rel}}$ <sup>e</sup> | $T / \text{K}$                                         | $C_{pm}^o / \text{J} \cdot \text{K}^{-1} \cdot \text{mol}^{-1}$ <sup>d</sup> | $C_{pm}^o$ corrected <sup>f</sup> | $\delta_{\text{rel}}$ <sup>e</sup> |
| 325.00                                                    | 168.35                                                                       | 0.21                               | 280.47                                                 | 148.64                                                                       | 148.76                            | −0.16                              |
| 330.00                                                    | 170.44                                                                       | 0.19                               | 285.45                                                 | 150.94                                                                       | 151.05                            | −0.05                              |
| 335.00                                                    | 172.52                                                                       | 0.17                               | 290.43                                                 | 153.21                                                                       | 153.32                            | 0.04                               |
| 340.00                                                    | 174.57                                                                       | 0.13                               | 295.41                                                 | 155.42                                                                       | 155.54                            | 0.10                               |
| 345.00                                                    | 176.72                                                                       | 0.15                               | 300.39                                                 | 157.67                                                                       | 157.79                            | 0.18                               |
| 350.00                                                    | 179.07                                                                       | 0.28                               | 305.37                                                 | 159.99                                                                       | 160.11                            | 0.30                               |
| 355.00                                                    | 181.19                                                                       | 0.29                               | 310.36                                                 | 161.98                                                                       | 162.10                            | 0.21                               |
| 358.36                                                    | 182.15                                                                       | 0.04                               | 315.35                                                 | 164.19                                                                       | 164.32                            | 0.26                               |
|                                                           |                                                                              |                                    | 320.32                                                 | 166.41                                                                       | 166.54                            | 0.32                               |
|                                                           |                                                                              |                                    | 325.30                                                 | 168.45                                                                       | 168.58                            | 0.27                               |
|                                                           |                                                                              |                                    | 330.28                                                 | 170.50                                                                       | 170.63                            | 0.23                               |
|                                                           |                                                                              |                                    | 335.26                                                 | 172.90                                                                       | 173.03                            | 0.40                               |
|                                                           |                                                                              |                                    | 340.24                                                 | 174.93                                                                       | 175.06                            | 0.35                               |
|                                                           |                                                                              |                                    | 345.22                                                 | 176.88                                                                       | 177.02                            | 0.26                               |
|                                                           |                                                                              |                                    | 350.21                                                 | 178.99                                                                       | 179.13                            | 0.26                               |
|                                                           |                                                                              |                                    | 355.19                                                 | 181.01                                                                       | 181.14                            | 0.22                               |
|                                                           |                                                                              |                                    | 360.18                                                 | 183.05                                                                       | 183.19                            | 0.19                               |
|                                                           |                                                                              |                                    | 365.16                                                 | 185.62                                                                       | 185.76                            | 0.45                               |
|                                                           |                                                                              |                                    | 370.15                                                 | 187.09                                                                       | 187.23                            | 0.12                               |
|                                                           |                                                                              |                                    | 375.12                                                 | 188.81                                                                       | 188.95                            | −0.07                              |
|                                                           |                                                                              |                                    | 380.10                                                 | 191.20                                                                       | 191.35                            | 0.11                               |
|                                                           |                                                                              |                                    | 385.07                                                 | 193.18                                                                       | 193.33                            | 0.06                               |
|                                                           |                                                                              |                                    | 390.05                                                 | 194.93                                                                       | 195.08                            | −0.09                              |
|                                                           |                                                                              |                                    | 395.04                                                 | 196.63                                                                       | 196.78                            | −0.26                              |
|                                                           |                                                                              |                                    | 400.02                                                 | 198.69                                                                       | 198.84                            | −0.25                              |
|                                                           |                                                                              |                                    | 405.01                                                 | 201.26                                                                       | 201.41                            | 0.02                               |
|                                                           |                                                                              |                                    | 409.99                                                 | 204.10                                                                       | 204.26                            | 0.43                               |
|                                                           |                                                                              |                                    | 415.00                                                 | 205.93                                                                       | 206.09                            | 0.34                               |
|                                                           |                                                                              |                                    | 419.98                                                 | 207.86                                                                       | 208.02                            | 0.30                               |
|                                                           |                                                                              |                                    | 424.96                                                 | 209.15                                                                       | 209.31                            | −0.03                              |
|                                                           |                                                                              |                                    | 429.94                                                 | 211.01                                                                       | 211.17                            | −0.09                              |
|                                                           |                                                                              |                                    | 434.92                                                 | 212.85                                                                       | 213.01                            | −0.14                              |
|                                                           |                                                                              |                                    | 439.90                                                 | 210.43                                                                       | 210.59                            | −2.17                              |
|                                                           |                                                                              |                                    | 444.87                                                 | 215.26                                                                       | 215.42                            | −0.81                              |
|                                                           |                                                                              |                                    | 449.85                                                 | 217.52                                                                       | 217.69                            | −0.65                              |

<sup>a</sup> Polymorph I (refcode LTHREO deposited in the Cambridge structural database).

<sup>b</sup> Standard uncertainty of temperature is  $u(T) = 0.05$  K, and the combined expanded uncertainty of the heat capacity is  $U_c(C_{pm}^o) = 0.01 C_{pm}^o$  (0.95 level of confidence).

<sup>c</sup> Standard uncertainty of temperature is  $u(T) = 0.05$  K, and the combined expanded uncertainty of the heat capacity is  $U_c(C_{pm}^o) = 0.03 C_{pm}^o$  (0.95 level of confidence).

<sup>d</sup> Values are reported with one digit more than is justified by the experimental uncertainty to avoid round-off errors in calculations based on these results.

<sup>e</sup>  $\delta_{\text{rel}} = 100(C_{pm}^{\text{o,exp}} - C_{pm}^{\text{o,calc}}) / C_{pm}^{\text{o,calc}}$ , where  $C_{pm}^{\text{o,calc}}$  is heat capacity calculated by means of Eqs. 1 and 2 with parameters from Table 5.

<sup>f</sup> Experimental heat capacity data from PerkinElmer DSC 8500 have been multiplied by the factor of 1.009 to agree with the more accurate heat capacities obtained with SETARAM  $\mu$ DSC IIIa.

**Table S4** Experimental Molar Heat Capacity  $C_{pm}^o$  of L-Threonine<sup>a</sup> Obtained Using the Relaxation Technique (Quantum Design PPMS).<sup>b</sup>  $m_{THR} = 9.850$  mg,  $m_{Cu} = 15.024$  mg.

| $T / K$ | $C_{pm}^o$ <sup>c</sup> / J·K <sup>-1</sup> ·mol <sup>-1</sup> | $\delta_{rel}$ <sup>d</sup> | $T / K$ | $C_{pm}^o$ <sup>c</sup> / J·K <sup>-1</sup> ·mol <sup>-1</sup> | $\delta_{rel}$ <sup>d</sup> |
|---------|----------------------------------------------------------------|-----------------------------|---------|----------------------------------------------------------------|-----------------------------|
| Run 1   |                                                                |                             | Run 2   |                                                                |                             |
| 281.865 | 149.64                                                         | 0.03                        | 282.030 | 149.24                                                         | 0.03                        |
| 274.871 | 146.17                                                         | -0.29                       | 275.031 | 146.10                                                         | 0.17                        |
| 267.874 | 142.94                                                         | -0.29                       | 268.039 | 142.77                                                         | -0.30                       |
| 260.881 | 139.97                                                         | -0.39                       | 261.035 | 139.89                                                         | -0.35                       |
| 253.887 | 136.95                                                         | -0.46                       | 254.026 | 136.82                                                         | -0.30                       |
| 246.893 | 134.11                                                         | -0.63                       | 247.024 | 133.93                                                         | -0.38                       |
| 239.886 | 131.25                                                         | -0.45                       | 240.014 | 131.15                                                         | -0.25                       |
| 232.892 | 128.50                                                         | -0.56                       | 233.004 | 128.50                                                         | -0.25                       |
| 225.911 | 125.61                                                         | -0.47                       | 226.011 | 125.60                                                         | -0.18                       |
| 218.923 | 122.87                                                         | -0.61                       | 219.010 | 122.75                                                         | -0.19                       |
| 211.937 | 119.86                                                         | -0.36                       | 212.012 | 119.71                                                         | 0.34                        |
| 204.951 | 116.85                                                         | -0.54                       | 205.011 | 116.62                                                         | 0.38                        |
| 197.971 | 113.70                                                         | -0.25                       | 198.009 | 113.65                                                         | 0.42                        |
| 190.990 | 110.59                                                         | -0.37                       | 191.007 | 110.61                                                         | 0.42                        |
| 184.006 | 107.55                                                         | -0.06                       | 184.000 | 107.57                                                         | 0.06                        |
| 176.999 | 104.55                                                         | -0.09                       | 176.997 | 104.67                                                         | 0.14                        |
| 170.006 | 101.61                                                         | 0.04                        | 169.987 | 101.67                                                         | -0.10                       |
| 163.018 | 98.406                                                         | 0.00                        | 162.994 | 98.414                                                         | -0.08                       |
| 156.040 | 94.980                                                         | 0.27                        | 155.973 | 95.166                                                         | -0.21                       |
| 149.047 | 91.489                                                         | 0.15                        | 148.961 | 91.764                                                         | -0.18                       |
| 142.028 | 87.973                                                         | 0.29                        | 141.962 | 88.253                                                         | -0.15                       |
| 135.027 | 84.581                                                         | 0.14                        | 134.962 | 84.734                                                         | -0.11                       |
| 128.038 | 81.286                                                         | 0.32                        | 127.991 | 81.509                                                         | 0.15                        |
| 121.014 | 77.823                                                         | 0.11                        | 120.971 | 77.863                                                         | -0.30                       |
| 114.001 | 73.994                                                         | 0.24                        | 113.972 | 74.107                                                         | 0.25                        |
| 107.010 | 70.320                                                         | 0.18                        | 106.994 | 70.300                                                         | 0.33                        |
| 100.984 | 66.891                                                         | 0.21                        | 100.943 | 66.967                                                         | 0.04                        |
| 95.932  | 64.247                                                         | 0.22                        | 95.917  | 64.237                                                         | 0.01                        |
| 90.914  | 61.236                                                         | 0.24                        | 90.868  | 61.326                                                         | -0.06                       |
| 85.829  | 58.264                                                         | 0.27                        | 85.815  | 58.175                                                         | -0.79                       |
| 80.780  | 54.720                                                         | 0.35                        | 80.751  | 54.778                                                         | 0.56                        |
| 75.753  | 51.167                                                         | 0.47                        | 75.734  | 51.129                                                         | 0.11                        |
| 70.694  | 47.638                                                         | 0.55                        | 70.677  | 47.588                                                         | -0.03                       |
| 65.643  | 43.998                                                         | 0.62                        | 65.623  | 43.981                                                         | 0.00                        |
| 60.584  | 40.216                                                         | 0.51                        | 60.587  | 40.214                                                         | 0.01                        |
| 55.533  | 36.461                                                         | 0.53                        | 55.528  | 36.469                                                         | -0.12                       |
| 50.478  | 32.386                                                         | 0.26                        | 50.478  | 32.385                                                         | 0.27                        |
| 45.428  | 28.046                                                         | 0.49                        | 45.423  | 28.065                                                         | 0.15                        |
| 40.364  | 23.538                                                         | -0.03                       | 40.362  | 23.541                                                         | 0.23                        |
| 35.309  | 18.796                                                         | 0.31                        | 35.311  | 18.803                                                         | 0.15                        |
| 30.255  | 13.951                                                         | -0.30                       | 30.254  | 13.956                                                         | -0.25                       |
| 28.250  | 12.089                                                         | 0.05                        | 28.248  | 12.033                                                         | -0.26                       |
| 26.224  | 10.230                                                         | -0.37                       | 26.221  | 10.235                                                         | -0.49                       |
| 24.205  | 8.4364                                                         | -0.15                       | 24.202  | 8.4308                                                         | -0.25                       |
| 22.186  | 6.7623                                                         | -0.24                       | 22.181  | 6.7087                                                         | -0.17                       |
| 20.151  | 5.2374                                                         | 0.07                        | 20.163  | 5.2224                                                         | -0.84                       |
| 18.139  | 3.8210                                                         | -0.15                       | 18.139  | 3.8221                                                         | -0.92                       |
| 16.101  | 2.6198                                                         | -0.07                       | 16.104  | 2.6180                                                         | -0.79                       |
| 14.076  | 1.6663                                                         | -0.40                       | 14.080  | 1.6661                                                         | 0.69                        |

| $T / \text{K}$ | $C_{pm}^o / \text{J} \cdot \text{K}^{-1} \cdot \text{mol}^{-1}$ | $\delta_{\text{rel}}^d$ | $T / \text{K}$ | $C_{pm}^o / \text{J} \cdot \text{K}^{-1} \cdot \text{mol}^{-1}$ | $\delta_{\text{rel}}^d$ |
|----------------|-----------------------------------------------------------------|-------------------------|----------------|-----------------------------------------------------------------|-------------------------|
| Run 1          |                                                                 |                         | Run 2          |                                                                 |                         |
| 12.058         | 0.96011                                                         | −0.23                   | 12.061         | 0.96019                                                         | 0.49                    |
| 10.026         | 0.48515                                                         | −0.27                   | 10.030         | 0.48581                                                         | 0.48                    |
| 7.936          | 0.20749                                                         | −0.28                   | 7.951          | 0.20936                                                         | 1.94                    |
| 6.593          | 0.10963                                                         | −0.34                   | 6.588          | 0.10862                                                         | 0.20                    |
| 5.464          | 0.058454                                                        | −0.20                   | 5.463          | 0.058501                                                        | 0.18                    |
| 4.552          | 0.033204                                                        | 0.11                    | 4.552          | 0.033137                                                        | 1.91                    |
| 3.818          | 0.019222                                                        | 0.10                    | 3.818          | 0.019501                                                        | 3.19                    |
| 3.193          | 0.011144                                                        | 0.13                    | 3.193          | 0.011142                                                        | 1.37                    |
| 2.682          | 0.0067262                                                       | 0.33                    | 2.682          | 0.0068113                                                       | 1.72                    |
| 2.265          | 0.0040536                                                       | 0.49                    | 2.265          | 0.0040679                                                       | −4.40                   |
| 1.919          | 0.0023444                                                       | 0.35                    | 1.919          | 0.0023434                                                       | −4.44                   |

<sup>a</sup> Polymorph I (refcode LTHREO deposited in the Cambridge structural database).

<sup>b</sup> Standard uncertainty of temperature is  $u(T)=0.004 \text{ K}$ , and the combined expanded uncertainty of heat capacity  $U_c(C_{pm}^o)$  with 0.95 level of confidence ( $k=2$ ) is  $U_c(C_{pm}^o)=0.1 C_{pm}^o$  below 10 K;  $U_c(C_{pm}^o)=0.03 C_{pm}^o$  in temperature range (10 to 40) K;  $U_c(C_{pm}^o)=0.02 C_{pm}^o$  in temperature range (40 to 300) K. Values are reported with more digits than is justified by the experimental uncertainty to avoid round-off errors in calculations based on these results. Measurements are performed in vacuum (residual pressure  $p<10^{-4} \text{ Pa}$ ).

<sup>c</sup> Experimental heat capacity data from QuantumDesign PPMS have been multiplied by the factor of 1.015 to agree with the more accurate heat capacities obtained with SETARAM  $\mu\text{DSC IIIa}$  data.

<sup>d</sup>  $\delta_{\text{rel}} = 100(C_{pm}^{\text{o,exp}} - C_{pm}^{\text{o,calc}}) / C_{pm}^{\text{o,calc}}$ , where  $C_{pm}^{\text{o,calc}}$  is heat capacity calculated by means of Eqs. 1 and 2 with parameters from Table 5.

**Table S5:** Experimental Heat Capacity  $C_{pm}^o$  of L-Lysine ( $\text{J K}^{-1} \text{mol}^{-1}$ ) at  $p = (100 \pm 5) \text{ kPa}$

| SETARAM MicroCalvet <sup>a</sup><br>( $m = 483.6 \text{ mg}$ ) |                                                                   |                         | PerkinElmer DSC 8500 <sup>b</sup><br>( $m = 19.29 \text{ mg}$ ) |                                                                   |                                |                         |
|----------------------------------------------------------------|-------------------------------------------------------------------|-------------------------|-----------------------------------------------------------------|-------------------------------------------------------------------|--------------------------------|-------------------------|
| $T / \text{K}$                                                 | $C_{pm}^o / \text{J} \cdot \text{K}^{-1} \cdot \text{mol}^{-1}^c$ | $\delta_{\text{rel}}^d$ | $T / \text{K}$                                                  | $C_{pm}^o / \text{J} \cdot \text{K}^{-1} \cdot \text{mol}^{-1}^c$ | $C_{pm}^o \text{ corrected}^e$ | $\delta_{\text{rel}}^d$ |
| crIII                                                          |                                                                   |                         | crIII                                                           |                                                                   |                                |                         |
| 232.00                                                         | 176.25                                                            | −0.50                   | 215.74                                                          | 159.83                                                            | 161.43                         | −2.44                   |
| 235.00                                                         | 178.78                                                            | −0.34                   | 220.69                                                          | 163.61                                                            | 165.25                         | −2.17                   |
| 240.00                                                         | 183.41                                                            | 0.07                    | 225.64                                                          | 167.61                                                            | 169.29                         | −1.84                   |
| 245.00                                                         | 187.86                                                            | 0.16                    | 230.61                                                          | 172.00                                                            | 173.72                         | −1.35                   |
| 250.00                                                         | 192.81                                                            | 0.20                    | 235.58                                                          | 176.16                                                            | 177.92                         | −1.06                   |
| 255.00                                                         | 198.33                                                            | 0.10                    | 240.56                                                          | 180.64                                                            | 182.45                         | −0.71                   |
| 260.00                                                         | 204.83                                                            | −0.08                   | 245.54                                                          | 185.86                                                            | 187.72                         | −0.18                   |
| 265.00                                                         | 212.56                                                            | −0.34                   | 250.52                                                          | 191.79                                                            | 193.71                         | 0.38                    |
| 270.00                                                         | 222.35                                                            | −0.48                   | 255.51                                                          | 198.14                                                            | 200.12                         | 0.67                    |
| 275.00                                                         | 235.39                                                            | −0.22                   | 260.51                                                          | 205.53                                                            | 207.59                         | 0.89                    |
| 280.00                                                         | 253.14                                                            | 0.72                    | 265.50                                                          | 214.03                                                            | 216.17                         | 0.92                    |
| 285.00                                                         | 274.84                                                            | 1.59                    | 270.48                                                          | 224.52                                                            | 226.77                         | 1.00                    |
| 290.00                                                         | 291.80                                                            | −0.96                   | 275.46                                                          | 237.58                                                            | 239.96                         | 1.17                    |
| crII                                                           |                                                                   |                         | 280.44                                                          | 253.77                                                            | 256.31                         | 1.37                    |
| 295.00                                                         | 294.25                                                            | 0.25                    | 285.42                                                          | 271.68                                                            | 274.40                         | 0.75                    |
| 300.00                                                         | 288.24                                                            | 0.35                    | 290.40                                                          | 283.51 <sup>f</sup>                                               | 286.35                         | −3.52                   |
| 305.00                                                         | 283.07                                                            | −0.15                   | crII                                                            |                                                                   |                                |                         |
| 310.00                                                         | 281.09                                                            | −0.30                   | 295.38                                                          | 284.47                                                            | 287.31                         | −1.93                   |
| 315.00                                                         | 281.84                                                            | −0.14                   | 300.36                                                          | 281.07                                                            | 283.88                         | −1.05                   |
| 320.00                                                         | 284.44                                                            | 0.08                    | 305.34                                                          | 278.72                                                            | 281.51                         | −0.64                   |
| 325.00                                                         | 288.44                                                            | 0.26                    | 310.33                                                          | 279.02                                                            | 281.81                         | −0.03                   |
| 330.00                                                         | 293.45                                                            | 0.31                    | 315.31                                                          | 278.43                                                            | 281.21                         | −0.39                   |



| SETARAM MicroCalvet <sup>a</sup><br>(m = 483.6 mg) |                                                                |                             | PerkinElmer DSC 8500 <sup>b</sup><br>(m = 19.29 mg) |                                                                |                                   |                             |
|----------------------------------------------------|----------------------------------------------------------------|-----------------------------|-----------------------------------------------------|----------------------------------------------------------------|-----------------------------------|-----------------------------|
| <i>T</i> / K                                       | $C_{pm}^o$ / J·K <sup>-1</sup> ·mol <sup>-1</sup> <sup>c</sup> | $\delta_{rel}$ <sup>d</sup> | <i>T</i> / K                                        | $C_{pm}^o$ / J·K <sup>-1</sup> ·mol <sup>-1</sup> <sup>c</sup> | $C_{pm}^o$ corrected <sup>e</sup> | $\delta_{rel}$ <sup>d</sup> |
| 335.00                                             | 299.15                                                         | 0.17                        | 320.29                                              | 281.70                                                         | 284.52                            | 0.05                        |
| 340.00                                             | 305.43                                                         | −0.16                       | 325.26                                              | 285.87                                                         | 288.73                            | 0.28                        |
| 345.00                                             | 312.72                                                         | −0.49                       | 330.24                                              | 291.62                                                         | 294.54                            | 0.59                        |
| 350.00                                             | 322.19                                                         | −0.43                       | 335.23                                              | 297.48                                                         | 300.45                            | 0.50                        |
| 355.00                                             | 335.38                                                         | 0.46                        | 340.20                                              | 304.34                                                         | 307.38                            | 0.37                        |
| 360.00                                             | 354.76 <sup>f</sup>                                            | 2.86                        | 345.19                                              | 312.32                                                         | 315.44                            | 0.27                        |
|                                                    |                                                                |                             | 350.17                                              | 320.99                                                         | 324.20                            | 0.08                        |
|                                                    |                                                                |                             | 355.16                                              | 331.22                                                         | 334.53                            | 0.10                        |
|                                                    |                                                                |                             | 360.14                                              | 347.84 <sup>f</sup>                                            | 351.32                            | 1.77                        |
|                                                    |                                                                |                             | 365.13                                              | 408.49 <sup>f</sup>                                            | 412.57                            | 15.57                       |
|                                                    |                                                                |                             | 370.11                                              | 639.96 <sup>f</sup>                                            | 646.36                            | 75.02                       |
|                                                    |                                                                |                             |                                                     |                                                                | crI                               |                             |
|                                                    |                                                                |                             | 375.09                                              | 291.27                                                         | 294.18                            | 0.55                        |
|                                                    |                                                                |                             | 380.06                                              | 291.48                                                         | 294.39                            | −0.13                       |
|                                                    |                                                                |                             | 385.04                                              | 293.24                                                         | 296.17                            | −0.26                       |
|                                                    |                                                                |                             | 390.02                                              | 295.75                                                         | 298.71                            | −0.13                       |
|                                                    |                                                                |                             | 395.00                                              | 297.43                                                         | 300.40                            | −0.26                       |
|                                                    |                                                                |                             | 399.98                                              | 300.10                                                         | 303.10                            | −0.05                       |
|                                                    |                                                                |                             | 404.97                                              | 302.16                                                         | 305.18                            | −0.03                       |
|                                                    |                                                                |                             | 409.95                                              | 304.37                                                         | 307.41                            | 0.04                        |
|                                                    |                                                                |                             | 414.94                                              | 306.69                                                         | 309.76                            | 0.16                        |
|                                                    |                                                                |                             | 419.93                                              | 308.50                                                         | 311.58                            | 0.12                        |

<sup>a</sup> Standard uncertainty of temperature is  $u(T) = 0.05$  K, and the combined expanded uncertainty of the heat capacity is  $U_c(C_{pm}^o) = 0.01 C_{pm}^o$  (0.95 level of confidence).

<sup>b</sup> Standard uncertainty of temperature is  $u(T) = 0.05$  K, and the combined expanded uncertainty of the heat capacity is  $U_c(C_{pm}^o) = 0.03 C_{pm}^o$  (0.95 level of confidence).

<sup>c</sup> Values are reported with one digit more than is justified by the experimental uncertainty to avoid round-off errors in calculations based on these results.

<sup>d</sup>  $\delta_{rel} = 100(C_{pm}^{o,exp} - C_{pm}^{o,calc}) / C_{pm}^{o,calc}$ , where  $C_{pm}^{o,calc}$  is heat capacity calculated by means of Eqs. 1 and 2 with parameters from Table 5.

<sup>e</sup> Experimental heat capacity data from PerkinElmer DSC 8500 has been multiplied by the factor of 1.01 to agree with the more accurate heat capacities obtained with SETARAM  $\mu$ DSC IIIa.

<sup>f</sup> Values not considered in the correlation procedure because of their vicinity to the first-order phase transition.

**Table S6** Experimental Molar Heat Capacity  $C_{pm}^o$  of L-Lysine Obtained Using the Relaxation Technique (Quantum Design PPMS).<sup>a</sup>  $m_{Lys} = 8.858$  mg,  $m_{Cu} = 14.287$  mg.

| <i>T</i> / K | $C_{pm}^o$ <sup>b</sup> / J·K <sup>-1</sup> ·mol <sup>-1</sup> | $\delta_{rel}$ <sup>c</sup> | <i>T</i> / K | $C_{pm}^o$ <sup>b</sup> / J·K <sup>-1</sup> ·mol <sup>-1</sup> | $\delta_{rel}$ <sup>c</sup> |
|--------------|----------------------------------------------------------------|-----------------------------|--------------|----------------------------------------------------------------|-----------------------------|
| Run 1, crIII |                                                                |                             | Run 2, crIII |                                                                |                             |
| 281.586      | 253.48                                                         | −1.36                       | 281.143      | 252.96                                                         | −0.94                       |
| 274.581      | 231.43                                                         | −1.42                       | 274.170      | 231.30                                                         | −1.01                       |
| 267.571      | 216.09                                                         | −0.99                       | 267.173      | 216.34                                                         | −0.51                       |
| 260.552      | 205.28                                                         | −0.26                       | 260.152      | 205.72                                                         | 0.25                        |
| 253.492      | 196.98                                                         | 0.34                        | 253.090      | 197.31                                                         | 0.75                        |
| 246.400      | 190.08                                                         | 0.65                        | 245.995      | 190.33                                                         | 0.99                        |
| 239.330      | 183.98                                                         | 0.67                        | 238.940      | 184.22                                                         | 0.98                        |
| 232.295      | 178.29                                                         | 0.53                        | 231.908      | 178.42                                                         | 0.77                        |
| 225.300      | 172.60                                                         | 0.22                        | 224.926      | 172.81                                                         | 0.50                        |

| $T / \text{K}$ | $C_{pm}^{\circ \text{ b}} / \text{J} \cdot \text{K}^{-1} \cdot \text{mol}^{-1}$ | $\delta_{\text{rel}}^{\text{ c}}$ | $T / \text{K}$ | $C_{pm}^{\circ \text{ b}} / \text{J} \cdot \text{K}^{-1} \cdot \text{mol}^{-1}$ | $\delta_{\text{rel}}^{\text{ c}}$ |
|----------------|---------------------------------------------------------------------------------|-----------------------------------|----------------|---------------------------------------------------------------------------------|-----------------------------------|
| Run 1, crIII   |                                                                                 |                                   | Run 2, crIII   |                                                                                 |                                   |
| 218.314        | 167.40                                                                          | 0.09                              | 217.948        | 167.52                                                                          | 0.31                              |
| 211.311        | 162.17                                                                          | -0.16                             | 210.945        | 162.42                                                                          | 0.15                              |
| 204.327        | 157.34                                                                          | -0.26                             | 203.971        | 157.42                                                                          | -0.06                             |
| 197.339        | 152.64                                                                          | -0.35                             | 196.996        | 152.86                                                                          | -0.06                             |
| 190.336        | 148.26                                                                          | -0.30                             | 190.006        | 148.48                                                                          | -0.01                             |
| 183.345        | 144.09                                                                          | -0.15                             | 183.022        | 144.36                                                                          | 0.17                              |
| 176.366        | 140.15                                                                          | 0.11                              | 176.061        | 140.34                                                                          | 0.38                              |
| 169.363        | 136.06                                                                          | 0.25                              | 169.054        | 136.32                                                                          | 0.58                              |
| 162.392        | 131.75                                                                          | 0.20                              | 162.100        | 131.87                                                                          | 0.43                              |
| 155.291        | 127.26                                                                          | 0.06                              | 155.001        | 127.45                                                                          | 0.34                              |
| 148.379        | 123.02                                                                          | 0.02                              | 148.095        | 123.25                                                                          | 0.34                              |
| 141.391        | 118.84                                                                          | 0.09                              | 141.114        | 119.00                                                                          | 0.36                              |
| 134.383        | 114.43                                                                          | 0.01                              | 134.111        | 114.49                                                                          | 0.21                              |
| 127.424        | 109.65                                                                          | -0.37                             | 127.165        | 109.68                                                                          | -0.19                             |
| 120.396        | 104.99                                                                          | -0.53                             | 120.142        | 105.08                                                                          | -0.29                             |
| 113.399        | 100.40                                                                          | -0.53                             | 113.206        | 100.58                                                                          | -0.23                             |
| 100.386        | 91.743                                                                          | -0.21                             | 100.189        | 91.730                                                                          | -0.07                             |
| 95.345         | 88.287                                                                          | 0.03                              | 95.156         | 88.515                                                                          | 0.45                              |
| 90.271         | 84.752                                                                          | 0.38                              | 90.081         | 84.737                                                                          | 0.54                              |
| 85.238         | 80.786                                                                          | 0.37                              | 85.052         | 80.743                                                                          | 0.50                              |
| 80.260         | 76.460                                                                          | 0.03                              | 80.212         | 76.541                                                                          | 0.19                              |
| 75.170         | 71.883                                                                          | -0.33                             | 75.124         | 71.980                                                                          | -0.14                             |
| 70.202         | 67.420                                                                          | -0.44                             | 70.161         | 67.497                                                                          | -0.28                             |
| 65.128         | 62.591                                                                          | -0.68                             | 65.114         | 62.563                                                                          | -0.71                             |
| 60.049         | 57.974                                                                          | -0.20                             | 60.012         | 58.032                                                                          | -0.04                             |
| 55.015         | 53.106                                                                          | 0.25                              | 54.983         | 53.156                                                                          | 0.41                              |
| 49.979         | 47.659                                                                          | 0.10                              | 49.951         | 47.707                                                                          | 0.27                              |
| 44.932         | 41.948                                                                          | -0.07                             | 44.907         | 42.000                                                                          | 0.12                              |
| 39.865         | 36.071                                                                          | 0.13                              | 39.844         | 36.100                                                                          | 0.28                              |
| 34.830         | 29.826                                                                          | 0.00                              | 34.814         | 29.848                                                                          | 0.14                              |
| 29.746         | 23.286                                                                          | -0.35                             | 29.732         | 23.306                                                                          | -0.19                             |
| 27.728         | 20.772                                                                          | -0.09                             | 27.718         | 20.785                                                                          | 0.04                              |
| 25.732         | 18.255                                                                          | -0.03                             | 25.724         | 18.269                                                                          | 0.11                              |
| 23.779         | 15.816                                                                          | -0.06                             | 23.772         | 15.827                                                                          | 0.07                              |
| 21.774         | 13.411                                                                          | 0.13                              | 21.768         | 13.417                                                                          | 0.23                              |
| 19.798         | 11.092                                                                          | -0.03                             | 19.792         | 11.094                                                                          | 0.04                              |
| 17.840         | 8.9306                                                                          | -0.12                             | 17.837         | 8.9381                                                                          | 0.00                              |
| 15.835         | 6.8595                                                                          | -0.33                             | 15.831         | 6.8699                                                                          | -0.12                             |
| 13.750         | 4.9184                                                                          | -0.42                             | 13.750         | 4.9254                                                                          | -0.28                             |
| 11.757         | 3.3335                                                                          | 0.12                              | 11.755         | 3.3370                                                                          | 0.27                              |
| 9.221          | 1.7325                                                                          | 0.50                              | 9.220          | 1.7317                                                                          | 0.48                              |
| 7.274          | 0.87315                                                                         | 0.23                              | 7.273          | 0.87347                                                                         | 0.31                              |
| 6.062          | 0.50750                                                                         | 0.18                              | 6.062          | 0.50774                                                                         | 0.23                              |
| 5.067          | 0.29332                                                                         | -0.07                             | 5.067          | 0.29363                                                                         | 0.04                              |
| 4.253          | 0.16898                                                                         | 0.13                              | 4.253          | 0.16913                                                                         | 0.22                              |
| 3.589          | 0.096499                                                                        | -0.28                             | 3.589          | 0.096559                                                                        | -0.22                             |

| $T / \text{K}$ | $C_{pm}^o{}^b / \text{J} \cdot \text{K}^{-1} \cdot \text{mol}^{-1}$ | $\delta_{\text{rel}}{}^c$ | $T / \text{K}$ | $C_{pm}^o{}^b / \text{J} \cdot \text{K}^{-1} \cdot \text{mol}^{-1}$ | $\delta_{\text{rel}}{}^c$ |
|----------------|---------------------------------------------------------------------|---------------------------|----------------|---------------------------------------------------------------------|---------------------------|
| Run 1, crIII   |                                                                     |                           | Run 2, crIII   |                                                                     |                           |
| 3.047          | 0.055367                                                            | −0.85                     | 3.047          | 0.055369                                                            | −0.85                     |
| 2.609          | 0.032659                                                            | −0.79                     | 2.609          | 0.032654                                                            | −0.81                     |
| 2.259          | 0.020143                                                            | 0.19                      | 2.241          | 0.019586                                                            | 0.12                      |
| 1.992          | 0.013219                                                            | 1.12                      | 1.991          | 0.013139                                                            | 0.68                      |

<sup>a</sup> Standard uncertainty of temperature is  $u(T)=0.004 \text{ K}$ , and the combined expanded uncertainty of heat capacity  $U_c(C_{pm}^o)$  with 0.95 level of confidence ( $k=2$ ) is  $U_c(C_{pm}^o)=0.1 C_{pm}^o$  below 10 K;  $U_c(C_{pm}^o)=0.03 C_{pm}^o$  in temperature range (10 to 40) K;  $U_c(C_{pm}^o)=0.02 C_{pm}^o$  in temperature range (40 to 300) K. Values are reported with more digits than is justified by the experimental uncertainty to avoid round-off errors in calculations based on these results. Measurements are performed in vacuum (residual pressure  $p<10^{-4} \text{ Pa}$ ).

<sup>b</sup> Experimental heat capacity data from QuantumDesign PPMS have been multiplied by the factor of 0.993 to agree with the more accurate heat capacities obtained with SETARAM  $\mu\text{DSC IIIa}$  data.

<sup>c</sup>  $\delta_{\text{rel}} = 100(C_{pm}^{\text{o,exp}} - C_{pm}^{\text{o,calc}}) / C_{pm}^{\text{o,calc}}$ , where  $C_{pm}^{\text{o,calc}}$  is heat capacity calculated by means of Eqs. 1 and 2 with parameters from Table 5.

**Table S7:** Experimental Heat Capacity  $C_{pm}^o$  of L-Methionine ( $\text{J K}^{-1} \text{mol}^{-1}$ ) at  $p = (100 \pm 5) \text{ kPa}$

| SETARAM $\mu$ DSC IIIa <sup>a</sup><br>(m = 577.70 mg) |                                                                |                             | PerkinElmer DSC 8500 <sup>b</sup><br>(m = 20.79 mg) |                                                                |                                   |                             |
|--------------------------------------------------------|----------------------------------------------------------------|-----------------------------|-----------------------------------------------------|----------------------------------------------------------------|-----------------------------------|-----------------------------|
| $T$ / K                                                | $C_{pm}^o$ / J·K <sup>−1</sup> ·mol <sup>−1</sup> <sup>c</sup> | $\delta_{rel}$ <sup>d</sup> | $T$ / K                                             | $C_{pm}^o$ / J·K <sup>−1</sup> ·mol <sup>−1</sup> <sup>c</sup> | $C_{pm}^o$ corrected <sup>e</sup> | $\delta_{rel}$ <sup>d</sup> |
| crIV (refcode LMETON10)                                |                                                                |                             | crIV (refcode LMETON10)                             |                                                                |                                   |                             |
| 265.88                                                 | 198.86                                                         | −1.47                       | 215.77                                              | 155.68                                                         | 154.64                            | 0.01                        |
| 270.00                                                 | 206.04                                                         | −1.35                       | 220.72                                              | 158.98                                                         | 157.91                            | 0.18                        |
| 275.00                                                 | 215.53                                                         | −1.41                       | 225.67                                              | 162.10                                                         | 161.01                            | 0.14                        |
| 280.00                                                 | 226.39                                                         | −1.51                       | 230.64                                              | 165.29                                                         | 164.18                            | 0.01                        |
| 285.00                                                 | 239.20                                                         | −1.54                       | 235.61                                              | 169.16                                                         | 168.03                            | 0.11                        |
| 290.00                                                 | 254.65                                                         | −1.36                       | 240.59                                              | 173.17                                                         | 172.01                            | 0.08                        |
| 295.00                                                 | 273.31                                                         | −0.98                       | 245.57                                              | 177.72                                                         | 176.53                            | 0.08                        |
| 300.00                                                 | 295.51                                                         | −0.52                       | 250.55                                              | 182.74                                                         | 181.52                            | 0.03                        |
| 305.00                                                 | 319.29                                                         | −0.84                       | 255.55                                              | 187.81                                                         | 186.55                            | −0.35                       |
|                                                        |                                                                |                             | 260.54                                              | 193.37                                                         | 192.07                            | −0.88                       |
|                                                        |                                                                |                             | 265.53                                              | 200.50                                                         | 199.16                            | −1.03                       |
|                                                        |                                                                |                             | 270.52                                              | 208.35                                                         | 206.95                            | −1.35                       |
|                                                        |                                                                |                             | 275.50                                              | 217.82                                                         | 216.36                            | −1.49                       |
|                                                        |                                                                |                             | 280.48                                              | 229.47                                                         | 227.93                            | −1.34                       |
|                                                        |                                                                |                             | 285.45                                              | 243.16                                                         | 241.53                            | −1.10                       |
|                                                        |                                                                |                             | 290.44                                              | 260.06                                                         | 258.32                            | −0.49                       |
|                                                        |                                                                |                             | 295.42                                              | 279.56                                                         | 277.69                            | 0.03                        |
|                                                        |                                                                |                             | 300.40                                              | 303.85                                                         | 301.81                            | 0.99                        |
|                                                        |                                                                |                             | 305.38                                              | 327.01                                                         | 324.82                            | 0.25                        |
|                                                        |                                                                |                             | crIII (refcode LMETON13)                            |                                                                |                                   |                             |
|                                                        |                                                                |                             | 310.37                                              | 316.55                                                         | 314.43                            | −0.85                       |
|                                                        |                                                                |                             | 315.35                                              | 273.68                                                         | 271.85                            | −1.79                       |
|                                                        |                                                                |                             | 320.33                                              | 251.57                                                         | 249.88                            | −2.01                       |
|                                                        |                                                                |                             | 325.31                                              | 244.30                                                         | 242.66                            | −0.60                       |
|                                                        |                                                                |                             | 330.28                                              | 242.34                                                         | 240.72                            | 0.21                        |
|                                                        |                                                                |                             | 335.27                                              | 242.98                                                         | 241.35                            | 0.33                        |
|                                                        |                                                                |                             | 340.25                                              | 244.90                                                         | 243.26                            | 0.08                        |
|                                                        |                                                                |                             | 345.23                                              | 246.92                                                         | 245.27                            | −0.26                       |
|                                                        |                                                                |                             | 350.22                                              | 249.43                                                         | 247.76                            | −0.27                       |
|                                                        |                                                                |                             | 355.20                                              | 252.76                                                         | 251.07                            | 0.12                        |
| 310.00                                                 | 321.28                                                         | 0.07                        |                                                     |                                                                |                                   |                             |
| 315.00                                                 | 280.96                                                         | 0.73                        |                                                     |                                                                |                                   |                             |
| 320.00                                                 | 253.95                                                         | −0.81                       |                                                     |                                                                |                                   |                             |
| 325.00                                                 | 244.43                                                         | −0.05                       |                                                     |                                                                |                                   |                             |
| 330.00                                                 | 241.63                                                         | 0.56                        |                                                     |                                                                |                                   |                             |
| 335.00                                                 | 241.72                                                         | 0.52                        |                                                     |                                                                |                                   |                             |
| 340.00                                                 | 242.98                                                         | 0.02                        |                                                     |                                                                |                                   |                             |
| 345.00                                                 | 244.91                                                         | −0.36                       |                                                     |                                                                |                                   |                             |
| 350.00                                                 | 247.66                                                         | −0.27                       |                                                     |                                                                |                                   |                             |
| 353.31                                                 | 249.75                                                         | −0.06                       |                                                     |                                                                |                                   |                             |

| SETARAM $\mu$ DSC IIIa <sup>a</sup><br>(m = 577.70 mg) |                                                                            |                                  | PerkinElmer DSC 8500 <sup>b</sup><br>(m = 20.79 mg) |                                                                            |                                  |                                  |
|--------------------------------------------------------|----------------------------------------------------------------------------|----------------------------------|-----------------------------------------------------|----------------------------------------------------------------------------|----------------------------------|----------------------------------|
| $T / \text{K}$                                         | $C_{pm}^o / \text{J} \cdot \text{K}^{-1} \cdot \text{mol}^{-1} \text{ }^c$ | $\delta_{\text{rel}} \text{ }^d$ | $T / \text{K}$                                      | $C_{pm}^o / \text{J} \cdot \text{K}^{-1} \cdot \text{mol}^{-1} \text{ }^c$ | $C_{pm}^o \text{ corrected } ^e$ | $\delta_{\text{rel}} \text{ }^d$ |
|                                                        |                                                                            |                                  | 360.19                                              | 255.76                                                                     | 254.05                           | 0.37                             |
|                                                        |                                                                            |                                  | 365.17                                              | 258.82                                                                     | 257.09                           | 0.58                             |
|                                                        |                                                                            |                                  | 370.16                                              | 261.96                                                                     | 260.20                           | 0.68                             |
|                                                        |                                                                            |                                  | 375.13                                              | 264.91                                                                     | 263.14                           | 0.52                             |
|                                                        |                                                                            |                                  | 380.11                                              | 267.98                                                                     | 266.18                           | 0.15                             |
|                                                        |                                                                            |                                  | 385.08                                              | 271.74                                                                     | 269.92                           | -0.26                            |
|                                                        |                                                                            |                                  | 390.06                                              | 277.66                                                                     | 275.80                           | -0.27                            |
|                                                        |                                                                            |                                  | crII (refcode LMETON14)                             |                                                                            |                                  |                                  |
|                                                        |                                                                            |                                  | 395.05                                              | 309.03 <sup>f</sup>                                                        | 306.96                           | 12.85                            |
|                                                        |                                                                            |                                  | 400.03                                              | 272.99                                                                     | 271.16                           | -0.02                            |
|                                                        |                                                                            |                                  | 405.02                                              | 272.59                                                                     | 270.76                           | 0.05                             |
|                                                        |                                                                            |                                  | 410.00                                              | 276.73 <sup>f</sup>                                                        | 274.88                           | 1.72                             |
|                                                        |                                                                            |                                  | 414.99                                              | 280.55 <sup>f</sup>                                                        | 278.67                           | 3.19                             |
|                                                        |                                                                            |                                  | 419.98                                              | 283.55 <sup>f</sup>                                                        | 281.65                           | 4.29                             |
|                                                        |                                                                            |                                  | crI                                                 |                                                                            |                                  |                                  |
|                                                        |                                                                            |                                  | 424.96                                              | 272.40                                                                     | 270.57                           | 0.11                             |
|                                                        |                                                                            |                                  | 429.94                                              | 271.95                                                                     | 270.13                           | -0.19                            |
|                                                        |                                                                            |                                  | 434.92                                              | 272.98                                                                     | 271.15                           | -0.01                            |
|                                                        |                                                                            |                                  | 439.89                                              | 273.52                                                                     | 271.69                           | -0.08                            |
|                                                        |                                                                            |                                  | 444.87                                              | 273.90                                                                     | 272.06                           | -0.26                            |
|                                                        |                                                                            |                                  | 449.85                                              | 276.24                                                                     | 274.39                           | 0.21                             |
|                                                        |                                                                            |                                  | 454.83                                              | 277.80                                                                     | 275.94                           | 0.34                             |
|                                                        |                                                                            |                                  | 459.81                                              | 278.26                                                                     | 276.40                           | 0.01                             |
|                                                        |                                                                            |                                  | 464.80                                              | 279.78                                                                     | 277.91                           | 0.01                             |
|                                                        |                                                                            |                                  | 469.78                                              | 280.95                                                                     | 279.07                           | -0.17                            |

<sup>a</sup> Standard uncertainty of temperature is  $u(T) = 0.05 \text{ K}$ , and the combined expanded uncertainty of the heat capacity is  $U_c(C_{pm}^o) = 0.01 C_{pm}^o$  (0.95 level of confidence).

<sup>b</sup> Standard uncertainty of temperature is  $u(T) = 0.05 \text{ K}$ , and the combined expanded uncertainty of the heat capacity is  $U_c(C_{pm}^o) = 0.03 C_{pm}^o$  (0.95 level of confidence).

<sup>c</sup> Values are reported with one digit more than is justified by the experimental uncertainty to avoid round-off errors in calculations based on these results.

<sup>d</sup>  $\delta_{\text{rel}} = 100(C_{pm}^{\text{o,exp}} - C_{pm}^{\text{o,calc}}) / C_{pm}^{\text{o,calc}}$ , where  $C_{pm}^{\text{o,calc}}$  is heat capacity calculated by means of Eqs. 1 and 2 with parameters from Table 5.

<sup>e</sup> Experimental heat capacity data from PerkinElmer DSC 8500 has been multiplied by the factor of 0.9933 to agree with the more accurate heat capacities obtained with SETARAM  $\mu$ DSC IIIa.

<sup>f</sup> Values not considered in the correlation procedure because of their vicinity to the first-order phase transition.

### 3) Tabulated thermodynamic functions

Standard thermodynamic functions were calculated using fundamental thermodynamic relationships (assuming residual entropy at 0 K for all crystalline amino acids to be 0 J·K<sup>-1</sup>·mol<sup>-1</sup>) and heat capacities  $C_{pm}^o(T)$  represented by Eqs 1 and 2 using parameters listed in Table 5:

$$S_m^o(T) = \int_0^T \frac{C_{pm}^o(T)}{T} dT \quad (S1)$$

$$\Delta_0^T H_m^o = \int_0^T C_{pm}^o(T) dT \quad (S2)$$

$$\Delta_0^T G_m^o = \Delta_0^T H_m^o - TS_m^o(T) \quad (S3)$$

**Table S8.** Standard Thermodynamic Functions of L-Cysteine in the Crystal State<sup>a</sup> at  $p = 0.1\text{MPa}$ .<sup>b</sup>

| $T / \text{K}$                             | $C_{pm}^o / \text{J} \cdot \text{K}^{-1} \cdot \text{mol}^{-1}$ | $S_m^o / \text{J} \cdot \text{K}^{-1} \cdot \text{mol}^{-1}$ | $\Delta_0^T H_m^o / \text{kJ} \cdot \text{mol}^{-1}$ | $\Delta_0^T G_m^o / \text{kJ} \cdot \text{mol}^{-1}$ |
|--------------------------------------------|-----------------------------------------------------------------|--------------------------------------------------------------|------------------------------------------------------|------------------------------------------------------|
| crystal Ia (refcode LCYSTN22) <sup>a</sup> |                                                                 |                                                              |                                                      |                                                      |
| 1 <sup>c</sup>                             | 4.184E-04                                                       | 1.347E-04                                                    | 1.017E-07                                            | -3.295E-08                                           |
| 2 <sup>c</sup>                             | 3.832E-03                                                       | 1.196E-03                                                    | 1.818E-06                                            | -5.740E-07                                           |
| 3 <sup>c</sup>                             | 1.467E-02                                                       | 4.459E-03                                                    | 1.022E-05                                            | -3.154E-06                                           |
| 4 <sup>c</sup>                             | 3.905E-02                                                       | 1.161E-02                                                    | 3.565E-05                                            | -1.078E-05                                           |
| 5 <sup>c</sup>                             | 8.474E-02                                                       | 2.476E-02                                                    | 9.541E-05                                            | -2.837E-05                                           |
| 6                                          | 1.609E-01                                                       | 4.640E-02                                                    | 2.153E-04                                            | -6.312E-05                                           |
| 7                                          | 2.775E-01                                                       | 7.937E-02                                                    | 4.307E-04                                            | -1.249E-04                                           |
| 8                                          | 4.446E-01                                                       | 1.267E-01                                                    | 7.871E-04                                            | -2.267E-04                                           |
| 9                                          | 6.714E-01                                                       | 1.916E-01                                                    | 1.340E-03                                            | -3.842E-04                                           |
| 10                                         | 9.657E-01                                                       | 2.769E-01                                                    | 2.152E-03                                            | -6.166E-04                                           |
| 11                                         | 1.333                                                           | 3.856E-01                                                    | 3.295E-03                                            | -9.458E-04                                           |
| 12                                         | 1.774                                                           | 5.199E-01                                                    | 4.842E-03                                            | -1.396E-03                                           |
| 13                                         | 2.290                                                           | 6.818E-01                                                    | 6.868E-03                                            | -1.995E-03                                           |
| 14                                         | 2.876                                                           | 8.725E-01                                                    | 9.445E-03                                            | -2.769E-03                                           |
| 15                                         | 3.526                                                           | 1.093                                                        | 1.264E-02                                            | -3.750E-03                                           |
| 16                                         | 4.233                                                           | 1.343                                                        | 1.652E-02                                            | -4.965E-03                                           |
| 17                                         | 4.990                                                           | 1.622                                                        | 2.112E-02                                            | -6.444E-03                                           |
| 18                                         | 5.788                                                           | 1.929                                                        | 2.651E-02                                            | -8.218E-03                                           |
| 19                                         | 6.621                                                           | 2.264                                                        | 3.271E-02                                            | -1.031E-02                                           |
| 20                                         | 7.483                                                           | 2.626                                                        | 3.976E-02                                            | -1.276E-02                                           |
| 25                                         | 12.18                                                           | 4.789                                                        | 8.866E-02                                            | -3.106E-02                                           |
| 30                                         | 17.25                                                           | 7.455                                                        | 1.622E-01                                            | -6.148E-02                                           |
| 35                                         | 22.31                                                           | 10.50                                                        | 2.611E-01                                            | -1.062E-01                                           |
| 40                                         | 27.11                                                           | 13.79                                                        | 3.848E-01                                            | -1.669E-01                                           |
| 45                                         | 31.58                                                           | 17.25                                                        | 5.317E-01                                            | -2.444E-01                                           |
| 50                                         | 35.73                                                           | 20.79                                                        | 7.001E-01                                            | -3.395E-01                                           |
| 55                                         | 39.67                                                           | 24.38                                                        | 8.886E-01                                            | -4.524E-01                                           |
| 60                                         | 43.54                                                           | 28.00                                                        | 1.097                                                | -5.833E-01                                           |
| 65                                         | 47.50                                                           | 31.64                                                        | 1.324                                                | -7.324E-01                                           |
| 70                                         | 51.75                                                           | 35.31                                                        | 1.572                                                | -8.998E-01                                           |

| $T / \text{K}$                             | $C_{pm}^o / \text{J} \cdot \text{K}^{-1} \cdot \text{mol}^{-1}$ | $S_m^o / \text{J} \cdot \text{K}^{-1} \cdot \text{mol}^{-1}$ | $\Delta_0^T H_m^o / \text{kJ} \cdot \text{mol}^{-1}$ | $\Delta_0^T G_m^o / \text{kJ} \cdot \text{mol}^{-1}$ |
|--------------------------------------------|-----------------------------------------------------------------|--------------------------------------------------------------|------------------------------------------------------|------------------------------------------------------|
| crystal Ib (refcode LCYSTN12) <sup>a</sup> |                                                                 |                                                              |                                                      |                                                      |
| 75                                         | 57.41                                                           | 39.15                                                        | 1.851                                                | -1.039                                               |
| 80                                         | 60.52                                                           | 42.96                                                        | 2.146                                                | -1.198                                               |
| 85                                         | 63.23                                                           | 46.71                                                        | 2.455                                                | -1.375                                               |
| 90                                         | 65.81                                                           | 50.40                                                        | 2.778                                                | -1.571                                               |
| 95                                         | 68.26                                                           | 54.02                                                        | 3.113                                                | -1.785                                               |
| 100                                        | 70.62                                                           | 57.59                                                        | 3.460                                                | -2.017                                               |
| 110                                        | 75.07                                                           | 64.53                                                        | 4.189                                                | -2.534                                               |
| 120                                        | 79.24                                                           | 71.24                                                        | 4.961                                                | -3.120                                               |
| 130                                        | 83.21                                                           | 77.74                                                        | 5.773                                                | -3.771                                               |
| 140                                        | 87.05                                                           | 84.05                                                        | 6.624                                                | -4.487                                               |
| 150                                        | 90.81                                                           | 90.18                                                        | 7.514                                                | -5.264                                               |
| 160                                        | 94.51                                                           | 96.16                                                        | 8.440                                                | -6.102                                               |
| 170                                        | 98.18                                                           | 102.0                                                        | 9.404                                                | -6.999                                               |
| 180                                        | 101.8                                                           | 107.7                                                        | 10.40                                                | -7.954                                               |
| 190                                        | 105.5                                                           | 113.3                                                        | 11.44                                                | -8.966                                               |
| 200                                        | 109.1                                                           | 118.8                                                        | 12.51                                                | -10.033                                              |
| 210                                        | 112.7                                                           | 124.2                                                        | 13.62                                                | -11.15                                               |
| 220                                        | 116.3                                                           | 129.6                                                        | 14.77                                                | -12.33                                               |
| 230                                        | 119.9                                                           | 134.8                                                        | 15.95                                                | -13.56                                               |
| 240                                        | 123.5                                                           | 140.0                                                        | 17.17                                                | -14.84                                               |
| 250                                        | 127.2                                                           | 145.1                                                        | 18.42                                                | -16.17                                               |
| 260                                        | 130.8                                                           | 150.2                                                        | 19.71                                                | -17.55                                               |
| 270                                        | 134.4                                                           | 155.2                                                        | 21.03                                                | -18.99                                               |
| 273.15                                     | 135.5                                                           | 156.7                                                        | 21.46                                                | -19.45                                               |
| 280                                        | 138.0                                                           | 160.1                                                        | 22.40                                                | -20.47                                               |
| 290                                        | 141.7                                                           | 165.0                                                        | 23.79                                                | -22.00                                               |
| 298.15                                     | 144.6                                                           | 169.0                                                        | 24.96                                                | -23.28                                               |
| 300                                        | 145.3                                                           | 169.9                                                        | 25.23                                                | -23.58                                               |
| 310                                        | 148.9                                                           | 174.7                                                        | 26.70                                                | -25.21                                               |
| 320                                        | 152.5                                                           | 179.5                                                        | 28.21                                                | -26.89                                               |
| 330                                        | 156.2                                                           | 184.2                                                        | 29.75                                                | -28.61                                               |
| 340                                        | 159.8                                                           | 189.0                                                        | 31.33                                                | -30.38                                               |
| 350                                        | 163.3                                                           | 193.6                                                        | 32.94                                                | -32.20                                               |
| 360                                        | 166.9                                                           | 198.3                                                        | 34.60                                                | -34.07                                               |
| 370                                        | 170.5                                                           | 202.9                                                        | 36.28                                                | -35.98                                               |
| 380                                        | 174.0                                                           | 207.5                                                        | 38.00                                                | -37.94                                               |
| 390                                        | 177.5                                                           | 212.1                                                        | 39.76                                                | -39.94                                               |
| 400                                        | 180.9                                                           | 216.6                                                        | 41.55                                                | -41.99                                               |
| 410                                        | 184.4                                                           | 221.1                                                        | 43.37                                                | -44.09                                               |
| 420                                        | 187.7                                                           | 225.6                                                        | 45.23                                                | -46.23                                               |
| 430                                        | 191.1                                                           | 230.0                                                        | 47.12                                                | -48.41                                               |

<sup>a</sup> Crystal structure deposited in the Cambridge Structural Database; see also Table 2 in the main article.

<sup>b</sup> The combined expanded uncertainty of heat capacity  $U_c(C_{pm}^o)$  as well as of all calculated thermodynamic values (with 0.95 level of confidence,  $k=2$ ) is:  $U_c(X)=0.1 X$  below 10 K;  $U_c(X)=0.03 X$  in temperature range (10 to 40) K;  $U_c(X)=0.02 X$  in temperature range (40 to 260) K;  $U_c(X)=0.01 X$  in temperature range (260 to 350) K;  $U_c(X)=0.02 X$  in temperature range (350 to 450) K, where  $X$  represents the heat capacity or the thermodynamic property. Values are reported with one digit more than is justified by the experimental uncertainty to avoid round-off errors in calculations based on these results.

<sup>c</sup> Extrapolated values.

**Table S9.** Standard Thermodynamic Functions of L-Serine in the Crystal State<sup>a</sup> at  $p = 0.1$  MPa.<sup>b</sup>

| $T / \text{K}$  | $C_{pm}^{\circ} / \text{J} \cdot \text{K}^{-1} \cdot \text{mol}^{-1}$ | $S_{\text{m}}^{\circ} / \text{J} \cdot \text{K}^{-1} \cdot \text{mol}^{-1}$ | $\Delta_0^T H_{\text{m}}^{\circ} / \text{kJ} \cdot \text{mol}^{-1}$ | $\Delta_0^T G_{\text{m}}^{\circ} / \text{kJ} \cdot \text{mol}^{-1}$ |
|-----------------|-----------------------------------------------------------------------|-----------------------------------------------------------------------------|---------------------------------------------------------------------|---------------------------------------------------------------------|
| 1 <sup>c</sup>  | 4.258E-04                                                             | 1.378E-04                                                                   | 1.039E-07                                                           | -3.382E-08                                                          |
| 2 <sup>c</sup>  | 3.817E-03                                                             | 1.204E-03                                                                   | 1.826E-06                                                           | -5.814E-07                                                          |
| 3 <sup>c</sup>  | 1.429E-02                                                             | 4.412E-03                                                                   | 1.008E-05                                                           | -3.152E-06                                                          |
| 4 <sup>c</sup>  | 3.715E-02                                                             | 1.129E-02                                                                   | 3.452E-05                                                           | -1.062E-05                                                          |
| 5 <sup>c</sup>  | 7.874E-02                                                             | 2.363E-02                                                                   | 9.062E-05                                                           | -2.755E-05                                                          |
| 6 <sup>c</sup>  | 1.460E-01                                                             | 4.349E-02                                                                   | 2.006E-04                                                           | -6.039E-05                                                          |
| 7 <sup>c</sup>  | 2.460E-01                                                             | 7.304E-02                                                                   | 3.935E-04                                                           | -1.178E-04                                                          |
| 8 <sup>c</sup>  | 3.852E-01                                                             | 1.145E-01                                                                   | 7.056E-04                                                           | -2.105E-04                                                          |
| 9 <sup>c</sup>  | 5.692E-01                                                             | 1.700E-01                                                                   | 1.179E-03                                                           | -3.515E-04                                                          |
| 10 <sup>c</sup> | 8.018E-01                                                             | 2.416E-01                                                                   | 1.860E-03                                                           | -5.559E-04                                                          |
| 11              | 1.085                                                                 | 3.309E-01                                                                   | 2.799E-03                                                           | -8.406E-04                                                          |
| 12              | 1.419                                                                 | 4.393E-01                                                                   | 4.047E-03                                                           | -1.224E-03                                                          |
| 13              | 1.803                                                                 | 5.677E-01                                                                   | 5.654E-03                                                           | -1.726E-03                                                          |
| 14              | 2.232                                                                 | 7.168E-01                                                                   | 7.668E-03                                                           | -2.366E-03                                                          |
| 15              | 2.704                                                                 | 8.866E-01                                                                   | 1.013E-02                                                           | -3.166E-03                                                          |
| 16              | 3.214                                                                 | 1.077                                                                       | 1.309E-02                                                           | -4.147E-03                                                          |
| 17              | 3.757                                                                 | 1.288                                                                       | 1.657E-02                                                           | -5.328E-03                                                          |
| 18              | 4.330                                                                 | 1.519                                                                       | 2.061E-02                                                           | -6.730E-03                                                          |
| 19              | 4.931                                                                 | 1.769                                                                       | 2.524E-02                                                           | -8.372E-03                                                          |
| 20              | 5.556                                                                 | 2.038                                                                       | 3.048E-02                                                           | -1.027E-02                                                          |
| 25              | 9.061                                                                 | 3.643                                                                       | 6.678E-02                                                           | -2.430E-02                                                          |
| 30              | 13.03                                                                 | 5.641                                                                       | 1.219E-01                                                           | -4.736E-02                                                          |
| 35              | 17.21                                                                 | 7.961                                                                       | 1.974E-01                                                           | -8.125E-02                                                          |
| 40              | 21.44                                                                 | 10.54                                                                       | 2.940E-01                                                           | -1.274E-01                                                          |
| 45              | 25.61                                                                 | 13.30                                                                       | 4.117E-01                                                           | -1.869E-01                                                          |
| 50              | 29.68                                                                 | 16.21                                                                       | 5.500E-01                                                           | -2.607E-01                                                          |
| 55              | 33.59                                                                 | 19.23                                                                       | 7.082E-01                                                           | -3.492E-01                                                          |
| 60              | 37.33                                                                 | 22.31                                                                       | 8.856E-01                                                           | -4.530E-01                                                          |
| 65              | 40.88                                                                 | 25.44                                                                       | 1.081                                                               | -5.724E-01                                                          |
| 70              | 44.23                                                                 | 28.59                                                                       | 1.294                                                               | -7.075E-01                                                          |
| 75              | 47.40                                                                 | 31.75                                                                       | 1.523                                                               | -8.584E-01                                                          |
| 80              | 50.39                                                                 | 34.91                                                                       | 1.768                                                               | -1.025                                                              |
| 85              | 53.22                                                                 | 38.05                                                                       | 2.027                                                               | -1.207                                                              |
| 90              | 55.91                                                                 | 41.17                                                                       | 2.300                                                               | -1.406                                                              |
| 95              | 58.47                                                                 | 44.26                                                                       | 2.586                                                               | -1.619                                                              |
| 100             | 60.93                                                                 | 47.32                                                                       | 2.884                                                               | -1.848                                                              |
| 110             | 65.60                                                                 | 53.35                                                                       | 3.517                                                               | -2.352                                                              |
| 120             | 70.04                                                                 | 59.25                                                                       | 4.195                                                               | -2.915                                                              |
| 130             | 74.29                                                                 | 65.03                                                                       | 4.917                                                               | -3.536                                                              |
| 140             | 78.38                                                                 | 70.68                                                                       | 5.681                                                               | -4.215                                                              |
| 150             | 82.34                                                                 | 76.22                                                                       | 6.484                                                               | -4.949                                                              |
| 160             | 86.20                                                                 | 81.66                                                                       | 7.327                                                               | -5.739                                                              |
| 170             | 89.96                                                                 | 87.00                                                                       | 8.208                                                               | -6.582                                                              |
| 180             | 93.65                                                                 | 92.25                                                                       | 9.126                                                               | -7.479                                                              |
| 190             | 97.28                                                                 | 97.41                                                                       | 10.08                                                               | -8.427                                                              |
| 200             | 100.9                                                                 | 102.5                                                                       | 11.07                                                               | -9.426                                                              |
| 210             | 104.4                                                                 | 107.5                                                                       | 12.10                                                               | -10.48                                                              |
| 220             | 107.9                                                                 | 112.4                                                                       | 13.16                                                               | -11.58                                                              |

| $T / \text{K}$ | $C_{\text{pm}}^{\circ} / \text{J} \cdot \text{K}^{-1} \cdot \text{mol}^{-1}$ | $S_{\text{m}}^{\circ} / \text{J} \cdot \text{K}^{-1} \cdot \text{mol}^{-1}$ | $\Delta_0^T H_{\text{m}}^{\circ} / \text{kJ} \cdot \text{mol}^{-1}$ | $\Delta_0^T G_{\text{m}}^{\circ} / \text{kJ} \cdot \text{mol}^{-1}$ |
|----------------|------------------------------------------------------------------------------|-----------------------------------------------------------------------------|---------------------------------------------------------------------|---------------------------------------------------------------------|
| 230            | 111.4                                                                        | 117.3                                                                       | 14.26                                                               | -12.73                                                              |
| 240            | 114.8                                                                        | 122.1                                                                       | 15.39                                                               | -13.92                                                              |
| 250            | 118.3                                                                        | 126.9                                                                       | 16.55                                                               | -15.17                                                              |
| 260            | 121.7                                                                        | 131.6                                                                       | 17.75                                                               | -16.46                                                              |
| 270            | 125.1                                                                        | 136.2                                                                       | 18.99                                                               | -17.80                                                              |
| 273.15         | 126.2                                                                        | 137.7                                                                       | 19.38                                                               | -18.23                                                              |
| 280            | 128.5                                                                        | 140.9                                                                       | 20.26                                                               | -19.18                                                              |
| 290            | 132.0                                                                        | 145.4                                                                       | 21.56                                                               | -20.62                                                              |
| 298.15         | 134.7                                                                        | 149.1                                                                       | 22.64                                                               | -21.82                                                              |
| 300            | 135.4                                                                        | 150.0                                                                       | 22.89                                                               | -22.09                                                              |
| 310            | 138.8                                                                        | 154.5                                                                       | 24.27                                                               | -23.61                                                              |
| 320            | 142.2                                                                        | 158.9                                                                       | 25.67                                                               | -25.18                                                              |
| 330            | 145.6                                                                        | 163.3                                                                       | 27.11                                                               | -26.79                                                              |
| 340            | 149.0                                                                        | 167.7                                                                       | 28.58                                                               | -28.45                                                              |
| 350            | 152.5                                                                        | 172.1                                                                       | 30.09                                                               | -30.15                                                              |
| 360            | 155.9                                                                        | 176.5                                                                       | 31.63                                                               | -31.89                                                              |
| 370            | 159.3                                                                        | 180.8                                                                       | 33.21                                                               | -33.68                                                              |
| 380            | 162.8                                                                        | 185.1                                                                       | 34.82                                                               | -35.51                                                              |
| 390            | 166.2                                                                        | 189.3                                                                       | 36.46                                                               | -37.38                                                              |
| 400            | 169.7                                                                        | 193.6                                                                       | 38.14                                                               | -39.29                                                              |
| 410            | 173.1                                                                        | 197.8                                                                       | 39.86                                                               | -41.25                                                              |
| 420            | 176.6                                                                        | 202.0                                                                       | 41.60                                                               | -43.25                                                              |
| 430            | 180.0                                                                        | 206.2                                                                       | 43.39                                                               | -45.29                                                              |
| 440            | 183.5                                                                        | 210.4                                                                       | 45.20                                                               | -47.37                                                              |
| 450            | 187.0                                                                        | 214.6                                                                       | 47.06                                                               | -49.50                                                              |

<sup>a</sup> Crystal structure deposited in the Cambridge Structural Database with refcode LSERIN01 (see the section 2.2 and Table 2 in the main article).

<sup>b</sup> The combined expanded uncertainty of heat capacity  $U_c(C_{\text{pm}}^{\circ})$  as well as of all calculated thermodynamic values (with 0.95 level of confidence,  $k=2$ ) is:  $U_c(X)=0.1 X$  below 10 K;  $U_c(X)=0.03 X$  in temperature range (10 to 40) K;  $U_c(X)=0.02 X$  in temperature range (40 to 260) K;  $U_c(X)=0.01 X$  in temperature range (260 to 350) K;  $U_c(X)=0.02 X$  in temperature range (350 to 450) K, where  $X$  represents the heat capacity or the thermodynamic property. Values are reported with one digit more than is justified by the experimental uncertainty to avoid round-off errors in calculations based on these results.

<sup>c</sup> Extrapolated values.



**Table S10.** Standard Thermodynamic Functions of L-Threonine in the Crystal State<sup>a</sup> at  $p = 0.1$  MPa.<sup>b</sup>

| $T / \text{K}$ | $C_{p,m}^{\circ} / \text{J} \cdot \text{K}^{-1} \cdot \text{mol}^{-1}$ | $S_m^{\circ} / \text{J} \cdot \text{K}^{-1} \cdot \text{mol}^{-1}$ | $\Delta_0^T H_m^{\circ} / \text{kJ} \cdot \text{mol}^{-1}$ | $\Delta_0^T G_m^{\circ} / \text{kJ} \cdot \text{mol}^{-1}$ |
|----------------|------------------------------------------------------------------------|--------------------------------------------------------------------|------------------------------------------------------------|------------------------------------------------------------|
| 1 <sup>c</sup> | 3.608E-04                                                              | 1.222E-04                                                          | 9.133E-08                                                  | -3.086E-08                                                 |
| 2              | 2.770E-03                                                              | 9.413E-04                                                          | 1.405E-06                                                  | -4.773E-07                                                 |
| 3              | 9.223E-03                                                              | 3.113E-03                                                          | 6.975E-06                                                  | -2.364E-06                                                 |
| 4              | 2.207E-02                                                              | 7.340E-03                                                          | 2.197E-05                                                  | -7.387E-06                                                 |
| 5              | 4.436E-02                                                              | 1.445E-02                                                          | 5.425E-05                                                  | -1.800E-05                                                 |
| 6              | 8.014E-02                                                              | 2.546E-02                                                          | 1.152E-04                                                  | -3.759E-05                                                 |
| 7              | 1.347E-01                                                              | 4.163E-02                                                          | 2.208E-04                                                  | -7.064E-05                                                 |
| 8              | 2.145E-01                                                              | 6.450E-02                                                          | 3.929E-04                                                  | -1.231E-04                                                 |
| 9              | 3.275E-01                                                              | 9.592E-02                                                          | 6.608E-04                                                  | -2.025E-04                                                 |
| 10             | 4.817E-01                                                              | 1.380E-01                                                          | 1.062E-03                                                  | -3.185E-04                                                 |
| 11             | 6.847E-01                                                              | 1.930E-01                                                          | 1.641E-03                                                  | -4.828E-04                                                 |
| 12             | 9.413E-01                                                              | 2.632E-01                                                          | 2.449E-03                                                  | -7.096E-04                                                 |
| 13             | 1.256                                                                  | 3.506E-01                                                          | 3.542E-03                                                  | -1.015E-03                                                 |
| 14             | 1.631                                                                  | 4.570E-01                                                          | 4.981E-03                                                  | -1.417E-03                                                 |
| 15             | 2.068                                                                  | 5.840E-01                                                          | 6.825E-03                                                  | -1.936E-03                                                 |
| 16             | 2.566                                                                  | 7.331E-01                                                          | 9.137E-03                                                  | -2.593E-03                                                 |
| 17             | 3.122                                                                  | 9.050E-01                                                          | 1.198E-02                                                  | -3.410E-03                                                 |
| 18             | 3.733                                                                  | 1.101                                                              | 1.540E-02                                                  | -4.410E-03                                                 |
| 19             | 4.394                                                                  | 1.320                                                              | 1.946E-02                                                  | -5.619E-03                                                 |
| 20             | 5.098                                                                  | 1.563                                                              | 2.420E-02                                                  | -7.058E-03                                                 |
| 25             | 9.118                                                                  | 3.119                                                              | 5.944E-02                                                  | -1.853E-02                                                 |
| 30             | 13.73                                                                  | 5.183                                                              | 1.164E-01                                                  | -3.909E-02                                                 |
| 35             | 18.54                                                                  | 7.660                                                              | 1.971E-01                                                  | -7.105E-02                                                 |
| 40             | 23.23                                                                  | 10.44                                                              | 3.016E-01                                                  | -1.162E-01                                                 |
| 45             | 27.66                                                                  | 13.44                                                              | 4.289E-01                                                  | -1.758E-01                                                 |
| 50             | 31.86                                                                  | 16.57                                                              | 5.778E-01                                                  | -2.508E-01                                                 |
| 55             | 35.91                                                                  | 19.80                                                              | 7.473E-01                                                  | -3.417E-01                                                 |
| 60             | 39.84                                                                  | 23.09                                                              | 9.367E-01                                                  | -4.489E-01                                                 |
| 65             | 43.63                                                                  | 26.43                                                              | 1.145                                                      | -5.727E-01                                                 |
| 70             | 47.28                                                                  | 29.80                                                              | 1.373                                                      | -7.133E-01                                                 |
| 75             | 50.80                                                                  | 33.18                                                              | 1.618                                                      | -8.708E-01                                                 |
| 80             | 54.19                                                                  | 36.57                                                              | 1.881                                                      | -1.045                                                     |
| 85             | 57.45                                                                  | 39.96                                                              | 2.160                                                      | -1.237                                                     |
| 90             | 60.59                                                                  | 43.33                                                              | 2.455                                                      | -1.445                                                     |
| 95             | 63.63                                                                  | 46.69                                                              | 2.766                                                      | -1.670                                                     |
| 100            | 66.56                                                                  | 50.03                                                              | 3.091                                                      | -1.912                                                     |
| 110            | 72.14                                                                  | 56.63                                                              | 3.785                                                      | -2.445                                                     |
| 120            | 77.42                                                                  | 63.14                                                              | 4.533                                                      | -3.044                                                     |
| 130            | 82.45                                                                  | 69.54                                                              | 5.332                                                      | -3.707                                                     |
| 140            | 87.28                                                                  | 75.82                                                              | 6.181                                                      | -4.434                                                     |
| 150            | 91.96                                                                  | 82.01                                                              | 7.077                                                      | -5.223                                                     |
| 160            | 96.54                                                                  | 88.09                                                              | 8.020                                                      | -6.074                                                     |
| 170            | 101.1                                                                  | 94.08                                                              | 9.008                                                      | -6.985                                                     |
| 180            | 105.5                                                                  | 100.0                                                              | 10.04                                                      | -7.955                                                     |
| 190            | 109.9                                                                  | 105.8                                                              | 11.12                                                      | -8.984                                                     |
| 200            | 114.3                                                                  | 111.6                                                              | 12.24                                                      | -10.07                                                     |

| $T / \text{K}$ | $C_{pm}^o / \text{J} \cdot \text{K}^{-1} \cdot \text{mol}^{-1}$ | $S_m^o / \text{J} \cdot \text{K}^{-1} \cdot \text{mol}^{-1}$ | $\Delta_0^T H_m^o / \text{kJ} \cdot \text{mol}^{-1}$ | $\Delta_0^T G_m^o / \text{kJ} \cdot \text{mol}^{-1}$ |
|----------------|-----------------------------------------------------------------|--------------------------------------------------------------|------------------------------------------------------|------------------------------------------------------|
| 210            | 118.7                                                           | 117.2                                                        | 13.40                                                | -11.22                                               |
| 220            | 123.0                                                           | 122.9                                                        | 14.61                                                | -12.42                                               |
| 230            | 127.3                                                           | 128.4                                                        | 15.86                                                | -13.67                                               |
| 240            | 131.6                                                           | 133.9                                                        | 17.16                                                | -14.98                                               |
| 250            | 135.9                                                           | 139.4                                                        | 18.50                                                | -16.35                                               |
| 260            | 140.2                                                           | 144.8                                                        | 19.88                                                | -17.77                                               |
| 270            | 144.5                                                           | 150.2                                                        | 21.30                                                | -19.25                                               |
| 273.15         | 145.9                                                           | 151.9                                                        | 21.76                                                | -19.72                                               |
| 280            | 148.8                                                           | 155.5                                                        | 22.77                                                | -20.78                                               |
| 290            | 153.1                                                           | 160.8                                                        | 24.28                                                | -22.36                                               |
| 298.15         | 156.6                                                           | 165.1                                                        | 25.54                                                | -23.68                                               |
| 300            | 157.3                                                           | 166.1                                                        | 25.83                                                | -23.99                                               |
| 310            | 161.6                                                           | 171.3                                                        | 27.42                                                | -25.68                                               |
| 320            | 165.9                                                           | 176.5                                                        | 29.06                                                | -27.42                                               |
| 330            | 170.1                                                           | 181.7                                                        | 30.74                                                | -29.21                                               |
| 340            | 174.4                                                           | 186.8                                                        | 32.46                                                | -31.05                                               |
| 350            | 178.6                                                           | 191.9                                                        | 34.23                                                | -32.94                                               |
| 360            | 182.8                                                           | 197.0                                                        | 36.04                                                | -34.89                                               |
| 370            | 187.0                                                           | 202.1                                                        | 37.88                                                | -36.88                                               |
| 380            | 191.1                                                           | 207.1                                                        | 39.77                                                | -38.93                                               |
| 390            | 195.2                                                           | 212.1                                                        | 41.71                                                | -41.03                                               |
| 400            | 199.3                                                           | 217.1                                                        | 43.68                                                | -43.17                                               |
| 410            | 203.4                                                           | 222.1                                                        | 45.69                                                | -45.37                                               |
| 420            | 207.4                                                           | 227.1                                                        | 47.75                                                | -47.61                                               |
| 430            | 211.4                                                           | 232.0                                                        | 49.84                                                | -49.91                                               |
| 440            | 215.3                                                           | 236.9                                                        | 51.97                                                | -52.25                                               |
| 450            | 219.2                                                           | 241.8                                                        | 54.15                                                | -54.65                                               |

<sup>a</sup>Crystal structure deposited in the Cambridge Structural Database with refcode LTHREO (see the section 2.2 and Table 2 in the main article).

<sup>b</sup>The combined expanded uncertainty of heat capacity  $U_c(C_{pm}^o)$  as well as of all calculated thermodynamic values (with 0.95 level of confidence,  $k=2$ ) is:  $U_c(X)=0.1 X$  below 10 K;  $U_c(X)=0.03 X$  in temperature range (10 to 40) K;  $U_c(X)=0.02 X$  in temperature range (40 to 260) K;  $U_c(X)=0.01 X$  in temperature range (260 to 350) K;  $U_c(X)=0.02 X$  in temperature range (350 to 420) K, where  $X$  represents the heat capacity or the thermodynamic property. Values are reported with one digit more than is justified by the experimental uncertainty to avoid round-off errors in calculations based on these results.

<sup>c</sup>Extrapolated values.

**Table S11.** Standard Thermodynamic Functions of L-Lysine in the Crystal State<sup>a</sup> at  $p = 0.1$  MPa.<sup>b</sup>

| $T / \text{K}$ | $C_{pm}^o / \text{J} \cdot \text{K}^{-1} \cdot \text{mol}^{-1}$ | $S_m^o / \text{J} \cdot \text{K}^{-1} \cdot \text{mol}^{-1}$ | $\Delta_0^T H_m^o / \text{kJ} \cdot \text{mol}^{-1}$ | $\Delta_0^T G_m^o / \text{kJ} \cdot \text{mol}^{-1}$ |
|----------------|-----------------------------------------------------------------|--------------------------------------------------------------|------------------------------------------------------|------------------------------------------------------|
| crystal III    |                                                                 |                                                              |                                                      |                                                      |
| 1 <sup>c</sup> | 1.289E-03                                                       | 3.985E-04                                                    | 3.035E-07                                            | -9.500E-08                                           |
| 2              | 1.325E-02                                                       | 3.933E-03                                                    | 6.047E-06                                            | -1.818E-06                                           |
| 3              | 5.298E-02                                                       | 1.557E-02                                                    | 3.605E-05                                            | -1.065E-05                                           |
| 4              | 1.383E-01                                                       | 4.123E-02                                                    | 1.273E-04                                            | -3.764E-05                                           |
| 5              | 2.816E-01                                                       | 8.634E-02                                                    | 3.321E-04                                            | -9.960E-05                                           |
| 6              | 4.912E-01                                                       | 1.551E-01                                                    | 7.126E-04                                            | -2.182E-04                                           |
| 7              | 7.779E-01                                                       | 2.513E-01                                                    | 1.340E-03                                            | -4.190E-04                                           |
| 8              | 1.150                                                           | 3.785E-01                                                    | 2.297E-03                                            | -7.312E-04                                           |
| 9              | 1.610                                                           | 5.396E-01                                                    | 3.669E-03                                            | -1.187E-03                                           |
| 10             | 2.159                                                           | 7.369E-01                                                    | 5.547E-03                                            | -1.823E-03                                           |
| 11             | 2.795                                                           | 9.718E-01                                                    | 8.017E-03                                            | -2.674E-03                                           |
| 12             | 3.511                                                           | 1.245                                                        | 1.116E-02                                            | -3.779E-03                                           |
| 13             | 4.302                                                           | 1.557                                                        | 1.506E-02                                            | -5.177E-03                                           |
| 14             | 5.159                                                           | 1.907                                                        | 1.979E-02                                            | -6.906E-03                                           |
| 15             | 6.076                                                           | 2.294                                                        | 2.540E-02                                            | -9.003E-03                                           |
| 16             | 7.045                                                           | 2.716                                                        | 3.196E-02                                            | -1.151E-02                                           |
| 17             | 8.059                                                           | 3.174                                                        | 3.951E-02                                            | -1.445E-02                                           |
| 18             | 9.113                                                           | 3.664                                                        | 4.809E-02                                            | -1.786E-02                                           |
| 19             | 10.20                                                           | 4.186                                                        | 5.774E-02                                            | -2.179E-02                                           |
| 20             | 11.33                                                           | 4.738                                                        | 6.851E-02                                            | -2.625E-02                                           |
| 25             | 17.34                                                           | 7.901                                                        | 1.399E-01                                            | -5.757E-02                                           |
| 30             | 23.69                                                           | 11.62                                                        | 2.425E-01                                            | -1.062E-01                                           |
| 35             | 30.04                                                           | 15.75                                                        | 3.769E-01                                            | -1.745E-01                                           |
| 40             | 36.19                                                           | 20.17                                                        | 5.425E-01                                            | -2.642E-01                                           |
| 45             | 42.06                                                           | 24.77                                                        | 7.383E-01                                            | -3.765E-01                                           |
| 50             | 47.63                                                           | 29.49                                                        | 9.626E-01                                            | -5.121E-01                                           |
| 55             | 52.96                                                           | 34.29                                                        | 1.214                                                | -6.715E-01                                           |
| 60             | 58.04                                                           | 39.11                                                        | 1.492                                                | -8.550E-01                                           |
| 65             | 62.90                                                           | 43.95                                                        | 1.794                                                | -1.063                                               |
| 70             | 67.54                                                           | 48.78                                                        | 2.120                                                | -1.295                                               |
| 75             | 71.97                                                           | 53.60                                                        | 2.469                                                | -1.551                                               |
| 80             | 76.22                                                           | 58.38                                                        | 2.840                                                | -1.830                                               |
| 85             | 80.30                                                           | 63.12                                                        | 3.231                                                | -2.134                                               |
| 90             | 84.22                                                           | 67.82                                                        | 3.643                                                | -2.462                                               |
| 95             | 88.00                                                           | 72.48                                                        | 4.073                                                | -2.812                                               |
| 100            | 91.66                                                           | 77.09                                                        | 4.522                                                | -3.186                                               |
| 110            | 98.65                                                           | 86.15                                                        | 5.474                                                | -4.003                                               |
| 120            | 105.3                                                           | 95.02                                                        | 6.494                                                | -4.909                                               |
| 130            | 111.7                                                           | 103.7                                                        | 7.579                                                | -5.903                                               |
| 140            | 117.9                                                           | 112.2                                                        | 8.727                                                | -6.982                                               |
| 150            | 124.0                                                           | 120.6                                                        | 9.937                                                | -8.146                                               |
| 160            | 130.0                                                           | 128.8                                                        | 11.21                                                | -9.393                                               |
| 170            | 136.1                                                           | 136.8                                                        | 12.54                                                | -10.72                                               |
| 180            | 142.2                                                           | 144.8                                                        | 13.93                                                | -12.13                                               |
| 190            | 148.5                                                           | 152.6                                                        | 15.38                                                | -13.62                                               |

| $T / \text{K}$     | $C_{pm}^o / \text{J} \cdot \text{K}^{-1} \cdot \text{mol}^{-1}$ | $S_m^o / \text{J} \cdot \text{K}^{-1} \cdot \text{mol}^{-1}$ | $\Delta_0^T H_m^o / \text{kJ} \cdot \text{mol}^{-1}$ | $\Delta_0^T G_m^o / \text{kJ} \cdot \text{mol}^{-1}$ |
|--------------------|-----------------------------------------------------------------|--------------------------------------------------------------|------------------------------------------------------|------------------------------------------------------|
| 200                | 154.9                                                           | 160.4                                                        | 16.90                                                | -15.18                                               |
| 210                | 161.5                                                           | 168.1                                                        | 18.48                                                | -16.82                                               |
| 220                | 168.4                                                           | 175.8                                                        | 20.13                                                | -18.54                                               |
| 230                | 175.7                                                           | 183.4                                                        | 21.85                                                | -20.34                                               |
| 240                | 183.3                                                           | 191.1                                                        | 23.65                                                | -22.21                                               |
| 250                | 192.4                                                           | 198.7                                                        | 25.52                                                | -24.16                                               |
| 260                | 205.0                                                           | 206.5                                                        | 27.51                                                | -26.19                                               |
| 270                | 223.4                                                           | 214.6                                                        | 29.64                                                | -28.29                                               |
| 273.15             | 231.0                                                           | 217.2                                                        | 30.36                                                | -28.97                                               |
| 280                | 251.3                                                           | 223.2                                                        | 32.01                                                | -30.48                                               |
| 290                | 294.6                                                           | 232.7                                                        | 34.72                                                | -32.76                                               |
| 291.1 <sup>c</sup> | 300.7                                                           | 233.8                                                        | 35.05                                                | -33.01                                               |
| crystal II         |                                                                 |                                                              |                                                      |                                                      |
| 291.1 <sup>c</sup> | 300.5                                                           | 233.8                                                        | 35.05                                                | -33.01                                               |
| 298.15             | 289.2                                                           | 240.7                                                        | 37.09                                                | -34.69                                               |
| 300                | 287.2                                                           | 242.5                                                        | 37.62                                                | -35.13                                               |
| 310                | 281.9                                                           | 251.8                                                        | 40.46                                                | -37.60                                               |
| 320                | 284.2                                                           | 260.8                                                        | 43.29                                                | -40.17                                               |
| 330                | 292.6                                                           | 269.7                                                        | 46.17                                                | -42.82                                               |
| 340                | 305.9                                                           | 278.6                                                        | 49.16                                                | -45.56                                               |
| 350                | 323.6                                                           | 287.7                                                        | 52.30                                                | -48.39                                               |
| 360                | 344.9                                                           | 297.1                                                        | 55.64                                                | -51.32                                               |
| 370                | 369.0                                                           | 306.9                                                        | 59.21                                                | -54.34                                               |
| 370.3 <sup>c</sup> | 369.8                                                           | 307.2                                                        | 59.32                                                | -54.43                                               |
| crystal I          |                                                                 |                                                              |                                                      |                                                      |
| 370.3 <sup>c</sup> | 290.4                                                           | 315.7                                                        | 62.49                                                | -54.43                                               |
| 380                | 294.8                                                           | 323.0                                                        | 65.22                                                | -57.52                                               |
| 390                | 299.1                                                           | 330.7                                                        | 68.19                                                | -60.79                                               |
| 400                | 303.3                                                           | 338.3                                                        | 71.20                                                | -64.14                                               |
| 410                | 307.3                                                           | 345.9                                                        | 74.25                                                | -67.56                                               |
| 420                | 311.2                                                           | 353.3                                                        | 77.34                                                | -71.06                                               |

<sup>a</sup> Crystal structure deposited in the Cambridge Structural Database with refcode CUFFUG was reported without specification of temperature and probably corresponds to crystal III or crystal II (see the section 2.2 and Table 2 in the main article).

<sup>b</sup> The combined expanded uncertainty of heat capacity  $U_c(C_{pm}^o)$  as well as of all calculated thermodynamic values (with 0.95 level of confidence,  $k=2$ ) is:  $U_c(X)=0.1 X$  below 10 K;  $U_c(X)=0.03 X$  in temperature range (10 to 40) K;  $U_c(X)=0.02 X$  in temperature range (40 to 260) K;  $U_c(X)=0.01 X$  in temperature range (260 to 350) K;  $U_c(X)=0.02 X$  in temperature range (350 to 420) K, where  $X$  represents the heat capacity or the thermodynamic property. Values are reported with one digit more than is justified by the experimental uncertainty to avoid round-off errors in calculations based on these results.

<sup>c</sup> Extrapolated values.

**Table S12.** Standard Thermodynamic Functions of L-Methionine in the Crystal State<sup>a</sup> at  $p = 0.1$  MPa.<sup>b</sup>

| $T / \text{K}$                             | $C_{pm}^{\circ} / \text{J} \cdot \text{K}^{-1} \cdot \text{mol}^{-1}$ | $S_{\text{m}}^{\circ} / \text{J} \cdot \text{K}^{-1} \cdot \text{mol}^{-1}$ | $\Delta_0^T H_{\text{m}}^{\circ} / \text{kJ} \cdot \text{mol}^{-1}$ | $\Delta_0^T G_{\text{m}}^{\circ} / \text{kJ} \cdot \text{mol}^{-1}$ |
|--------------------------------------------|-----------------------------------------------------------------------|-----------------------------------------------------------------------------|---------------------------------------------------------------------|---------------------------------------------------------------------|
| crystal IV (refcode LMETON10) <sup>a</sup> |                                                                       |                                                                             |                                                                     |                                                                     |
| 1 <sup>c</sup>                             | 2.327E-03                                                             | 7.756E-04                                                                   | 5.818E-07                                                           | -1.939E-07                                                          |
| 2 <sup>c</sup>                             | 1.859E-02                                                             | 6.203E-03                                                                   | 9.304E-06                                                           | -3.102E-06                                                          |
| 3 <sup>c</sup>                             | 6.245E-02                                                             | 2.089E-02                                                                   | 4.697E-05                                                           | -1.569E-05                                                          |
| 4 <sup>c</sup>                             | 1.468E-01                                                             | 4.929E-02                                                                   | 1.477E-04                                                           | -4.945E-05                                                          |
| 5 <sup>c</sup>                             | 2.835E-01                                                             | 9.567E-02                                                                   | 3.581E-04                                                           | -1.203E-04                                                          |
| 6 <sup>c</sup>                             | 4.828E-01                                                             | 1.640E-01                                                                   | 7.356E-04                                                           | -2.481E-04                                                          |
| 7 <sup>c</sup>                             | 7.534E-01                                                             | 2.577E-01                                                                   | 1.348E-03                                                           | -4.567E-04                                                          |
| 8 <sup>c</sup>                             | 1.102                                                                 | 3.802E-01                                                                   | 2.268E-03                                                           | -7.731E-04                                                          |
| 9 <sup>c</sup>                             | 1.533                                                                 | 5.341E-01                                                                   | 3.579E-03                                                           | -1.228E-03                                                          |
| 10 <sup>c</sup>                            | 2.050                                                                 | 7.216E-01                                                                   | 5.364E-03                                                           | -1.853E-03                                                          |
| 11 <sup>c</sup>                            | 2.654                                                                 | 9.446E-01                                                                   | 7.708E-03                                                           | -2.683E-03                                                          |
| 12                                         | 3.343                                                                 | 1.204                                                                       | 1.070E-02                                                           | -3.754E-03                                                          |
| 13                                         | 4.115                                                                 | 1.502                                                                       | 1.442E-02                                                           | -5.104E-03                                                          |
| 14                                         | 4.967                                                                 | 1.838                                                                       | 1.896E-02                                                           | -6.771E-03                                                          |
| 15                                         | 5.893                                                                 | 2.211                                                                       | 2.438E-02                                                           | -8.792E-03                                                          |
| 16                                         | 6.889                                                                 | 2.623                                                                       | 3.077E-02                                                           | -1.121E-02                                                          |
| 17                                         | 7.946                                                                 | 3.072                                                                       | 3.818E-02                                                           | -1.405E-02                                                          |
| 18                                         | 9.059                                                                 | 3.558                                                                       | 4.668E-02                                                           | -1.736E-02                                                          |
| 19                                         | 10.22                                                                 | 4.078                                                                       | 5.631E-02                                                           | -2.118E-02                                                          |
| 20                                         | 11.42                                                                 | 4.633                                                                       | 6.713E-02                                                           | -2.553E-02                                                          |
| 25                                         | 17.82                                                                 | 7.861                                                                       | 1.401E-01                                                           | -5.647E-02                                                          |
| 30                                         | 24.37                                                                 | 11.69                                                                       | 2.456E-01                                                           | -1.051E-01                                                          |
| 35                                         | 30.67                                                                 | 15.93                                                                       | 3.833E-01                                                           | -1.741E-01                                                          |
| 40                                         | 36.64                                                                 | 20.41                                                                       | 5.517E-01                                                           | -2.648E-01                                                          |
| 45                                         | 42.35                                                                 | 25.06                                                                       | 7.493E-01                                                           | -3.785E-01                                                          |
| 50                                         | 47.80                                                                 | 29.81                                                                       | 9.748E-01                                                           | -5.156E-01                                                          |
| 55                                         | 52.99                                                                 | 34.61                                                                       | 1.227                                                               | -6.766E-01                                                          |
| 60                                         | 57.92                                                                 | 39.43                                                                       | 1.504                                                               | -8.617E-01                                                          |
| 65                                         | 62.59                                                                 | 44.26                                                                       | 1.806                                                               | -1.071                                                              |
| 70                                         | 67.03                                                                 | 49.06                                                                       | 2.130                                                               | -1.304                                                              |
| 75                                         | 71.24                                                                 | 53.83                                                                       | 2.476                                                               | -1.562                                                              |
| 80                                         | 75.24                                                                 | 58.55                                                                       | 2.842                                                               | -1.842                                                              |
| 85                                         | 79.06                                                                 | 63.23                                                                       | 3.228                                                               | -2.147                                                              |
| 90                                         | 82.71                                                                 | 67.85                                                                       | 3.632                                                               | -2.475                                                              |
| 95                                         | 86.21                                                                 | 72.42                                                                       | 4.055                                                               | -2.825                                                              |
| 100                                        | 89.57                                                                 | 76.93                                                                       | 4.494                                                               | -3.199                                                              |
| 110                                        | 95.94                                                                 | 85.77                                                                       | 5.422                                                               | -4.012                                                              |
| 120                                        | 101.9                                                                 | 94.37                                                                       | 6.412                                                               | -4.913                                                              |
| 130                                        | 107.6                                                                 | 102.8                                                                       | 7.460                                                               | -5.899                                                              |
| 140                                        | 113.1                                                                 | 110.9                                                                       | 8.564                                                               | -6.968                                                              |
| 150                                        | 118.5                                                                 | 118.9                                                                       | 9.722                                                               | -8.117                                                              |
| 160                                        | 123.8                                                                 | 126.8                                                                       | 10.93                                                               | -9.346                                                              |
| 170                                        | 129.1                                                                 | 134.4                                                                       | 12.20                                                               | -10.65                                                              |
| 180                                        | 134.4                                                                 | 141.9                                                                       | 13.52                                                               | -12.03                                                              |
| 190                                        | 139.9                                                                 | 149.4                                                                       | 14.89                                                               | -13.49                                                              |

| $T / \text{K}$                              | $C_{pm}^o / \text{J} \cdot \text{K}^{-1} \cdot \text{mol}^{-1}$ | $S_m^o / \text{J} \cdot \text{K}^{-1} \cdot \text{mol}^{-1}$ | $\Delta_0^T H_m^o / \text{kJ} \cdot \text{mol}^{-1}$ | $\Delta_0^T G_m^o / \text{kJ} \cdot \text{mol}^{-1}$ |
|---------------------------------------------|-----------------------------------------------------------------|--------------------------------------------------------------|------------------------------------------------------|------------------------------------------------------|
| 200                                         | 145.4                                                           | 156.7                                                        | 16.31                                                | -15.02                                               |
| 210                                         | 151.2                                                           | 163.9                                                        | 17.80                                                | -16.62                                               |
| 220                                         | 157.2                                                           | 171.1                                                        | 19.34                                                | -18.30                                               |
| 230                                         | 163.7                                                           | 178.2                                                        | 20.94                                                | -20.04                                               |
| 240                                         | 171.4                                                           | 185.3                                                        | 22.62                                                | -21.86                                               |
| 250                                         | 180.9                                                           | 192.5                                                        | 24.38                                                | -23.75                                               |
| 260                                         | 193.0                                                           | 199.8                                                        | 26.24                                                | -25.71                                               |
| 270                                         | 208.9                                                           | 207.4                                                        | 28.25                                                | -27.75                                               |
| 273.15                                      | 214.8                                                           | 209.9                                                        | 28.92                                                | -28.41                                               |
| 280                                         | 229.9                                                           | 215.4                                                        | 30.44                                                | -29.86                                               |
| 290                                         | 258.2                                                           | 223.9                                                        | 32.87                                                | -32.06                                               |
| 298.15                                      | 288.9                                                           | 231.5                                                        | 35.09                                                | -33.91                                               |
| 300                                         | 297.1                                                           | 233.3                                                        | 35.64                                                | -34.34                                               |
| 308.4 <sup>c</sup>                          | 341.7                                                           | 242.0                                                        | 38.31                                                | -36.34                                               |
| crystal III (refcode LMETON13) <sup>a</sup> |                                                                 |                                                              |                                                      |                                                      |
| 308.4 <sup>c</sup>                          | 340.9                                                           | 242.0                                                        | 38.31                                                | -36.34                                               |
| 310                                         | 321.1                                                           | 243.8                                                        | 38.84                                                | -36.73                                               |
| 320                                         | 256.0                                                           | 252.7                                                        | 41.66                                                | -39.21                                               |
| 325                                         | 244.6                                                           | 256.6                                                        | 42.91                                                | -40.48                                               |
| 330                                         | 240.3                                                           | 260.3                                                        | 44.12                                                | -41.78                                               |
| 340                                         | 242.9                                                           | 267.5                                                        | 46.52                                                | -44.41                                               |
| 350                                         | 248.3                                                           | 274.6                                                        | 48.98                                                | -47.13                                               |
| 360                                         | 253.0                                                           | 281.7                                                        | 51.49                                                | -49.91                                               |
| 370                                         | 258.4                                                           | 288.7                                                        | 54.04                                                | -52.76                                               |
| 380                                         | 265.7                                                           | 295.6                                                        | 56.66                                                | -55.68                                               |
| 390                                         | 276.5                                                           | 302.7                                                        | 59.37                                                | -58.67                                               |
| 393.0 <sup>c</sup>                          | 280.6                                                           | 304.8                                                        | 60.20                                                | -59.58                                               |
| crystal II (refcode LMETON14) <sup>a</sup>  |                                                                 |                                                              |                                                      |                                                      |
| 393.0 <sup>c</sup>                          | 272.4                                                           | 305.1                                                        | 60.33                                                | -59.58                                               |
| 400                                         | 271.2                                                           | 309.9                                                        | 62.24                                                | -61.73                                               |
| 410                                         | 270.2                                                           | 316.6                                                        | 64.94                                                | -64.87                                               |
| 420                                         | 270.1                                                           | 323.1                                                        | 67.64                                                | -68.07                                               |
| 421.0 <sup>c</sup>                          | 270.1                                                           | 323.8                                                        | 67.91                                                | -68.39                                               |
| crystal I                                   |                                                                 |                                                              |                                                      |                                                      |
| 421.0 <sup>c</sup>                          | 270.1                                                           | 323.9                                                        | 67.95                                                | -68.39                                               |
| 430                                         | 270.6                                                           | 329.6                                                        | 70.39                                                | -71.33                                               |
| 440                                         | 271.9                                                           | 335.8                                                        | 73.10                                                | -74.66                                               |
| 450                                         | 273.9                                                           | 341.9                                                        | 75.83                                                | -78.05                                               |
| 460                                         | 276.4                                                           | 348.0                                                        | 78.58                                                | -81.50                                               |
| 470                                         | 279.6                                                           | 354.0                                                        | 81.36                                                | -85.01                                               |

<sup>a</sup> Crystal structure deposited in the Cambridge Structural Database; see also Table 2 in the main article.

<sup>b</sup> The combined expanded uncertainty of heat capacity  $U_c(C_{pm}^o)$  as well as of all calculated thermodynamic values (with 0.95 level of confidence,  $k=2$ ) is:  $U_c(X)=0.1 X$  below 10 K;  $U_c(X)=0.03 X$  in temperature range (10 to 40) K;  $U_c(X)=0.02 X$  in temperature range (40 to 260) K;  $U_c(X)=0.01 X$  in temperature range (260 to 350) K;  $U_c(X)=0.02 X$  in temperature range (350 to 430) K, where  $X$  represents the heat capacity or the thermodynamic property. Values are reported with one digit more than is justified by the experimental uncertainty to avoid round-off errors in calculations based on these results.

<sup>c</sup> Extrapolated values.

## References

1. Varushchenko, R.M.; Druzhinina, A.I.; Sorkin, E.L. Low-temperature heat capacity of 1-bromoperfluorooctane. *J. Chem. Thermodyn.* **1997**, *29*, 623-637, doi:<https://doi.org/10.1006/jcht.1996.0173>.
2. Lukyanova, V.A.; Druzhinina, A.I.; Pimenova, S.M.; Ioutsi, V.A.; Buyanovskaya, A.G.; Takazova, R.U.; Sagadeev, E.V.; Gimadeev, A.A. Thermodynamic properties of l-tryptophan. *J. Chem. Thermodyn.* **2017**, *105*, 44-49, doi:<https://doi.org/10.1016/j.jct.2016.09.041>.
3. Lukyanova, V.A.; Druzhinina, A.I.; Pimenova, S.M.; Ioutsi, V.A.; Buyanovskaya, A.G.; Takazova, R.U.; Sagadeev, E.V.; Gimadeev, A.A. Thermodynamic properties of l-threonine. *J. Chem. Thermodyn.* **2018**, *116*, 248-252, doi:<https://doi.org/10.1016/j.jct.2017.09.022>.
4. Cole, A.G.; Hutchens, J.O.; Stout, J.W. Heat capacities from 11 to 305°K. and entropies of L-phenylalanine, L-proline, L-tryptophan, and L-tyrosine. Some free energies of formation. *J. Phys. Chem.* **1963**, *67*, 1852-1855, doi:<https://doi.org/10.1021/j100803a027>.
5. Pokorný, V.; Štejfa, V.; Havlín, J.; Růžička, K.; Fulem, M. Heat Capacities of l-Histidine, l-Phenylalanine, l-Proline, l-Tryptophan and l-Tyrosine. *Molecules* **2021**, *26*, 4298, doi:<https://doi.org/10.3390/molecules26144298>.
6. Deiko, Y.A.; Il'in, D.Y.; Druzhinina, A.I.; Konstantinova, N.M.; Lukonina, N.S.; Dmitrienko, A.O.; Lysenko, K.A.; Tarazanov, S.V.; Luk'yanova, V.A. Thermodynamic Properties of L-Asparagine Monohydrate. *Russ. J. Phys. Chem. A* **2022**, *96*, 1840-1848, doi:<https://doi.org/10.1134/S0036024422090060>.
7. Hutchens, J.O.; Cole, A.G.; Robie, R.A.; Stout, J.W. Heat capacities from 11 to 305°K, entropies and free energies of formation of L-asparagine monohydrate, L-aspartic acid, L-glutamic acid, and L-glutamine. *J. Biol. Chem.* **1963**, *238*, 2407-2412, doi:[https://doi.org/10.1016/S0021-9258\(19\)67985-8](https://doi.org/10.1016/S0021-9258(19)67985-8).
